# Supplementary material for: Mir-29b Mediates the Neural Tube versus Neural Crest Fate Decision during Embryonic Stem Cell Neural Differentiation
Source: PubMed Central journal article supplement (PMC5550033; doi:10.1016/j.stemcr.2017.06.017), 2017-07-27
Supplement: mmc2.pdf [file mmc2.pdf]

# Mir-29b Mediates the Neural Tube versus Neural Crest Fate Decision during Embryonic Stem Cell Neural Differentiation

Jiajie Xi,<sup>1,3</sup> Yukang Wu,<sup>1,3</sup> Guoping Li,<sup>1</sup> Li Ma,<sup>1</sup> Ke Feng,<sup>1</sup> Xudong Guo,<sup>1</sup> Wenwen Jia,<sup>1</sup> Guiying Wang,<sup>1</sup> Guang Yang,<sup>1</sup> Ping Li,<sup>1,\*</sup> and Jihong Kang<sup>1,2,\*</sup>

<sup>1</sup>Clinical and Translational Research Center of Shanghai First Maternity and Infant Health Hospital, Shanghai Key Laboratory of Signaling and Disease Research, School of Life Science and Technology, Tongji University, 1239 Siping Road, Shanghai 200092, PR China

<sup>2</sup>The Collaborative Innovation Center for Brain Science, Tongji University, Shanghai 200092, PR China

<sup>3</sup>Co-first author

\*Correspondence: [liping01@tongji.edu.cn](mailto:liping01@tongji.edu.cn) (P.L.), [jhkang@tongji.edu.cn](mailto:jhkang@tongji.edu.cn) (J.K.)

<http://dx.doi.org/10.1016/j.stemcr.2017.06.017>

## SUMMARY

During gastrulation, the neuroectoderm cells form the neural tube and neural crest. The nervous system contains significantly more microRNAs than other tissues, but the role of microRNAs in controlling the differentiation of neuroectodermal cells into neural tube epithelial (NTE) cells and neural crest cells (NCCs) remains unknown. Using embryonic stem cell (ESC) neural differentiation systems, we found that miR-29b was upregulated in NTE cells and downregulated in NCCs. MiR-29b promoted the differentiation of ESCs into NTE cells and inhibited their differentiation into NCCs. Accordingly, the inhibition of miR-29b significantly inhibited the differentiation of NTE cells. A mechanistic study revealed that miR-29b targets *DNA methyltransferase 3a (Dnmt3a)* to regulate neural differentiation. Moreover, miR-29b mediated the function of *Pou3f1*, a critical neural transcription factor. Therefore, our study showed that the *Pou3f1*-miR-29b-*Dnmt3a* regulatory axis was active at the initial stage of neural differentiation and regulated the determination of cell fate.

## INTRODUCTION

The structure and function of the nervous system are highly complex, and its development and differentiation have been extensively studied. During the gastrula stage, the entire nervous system is derived from a layer of epithelial-like cells on the dorsal surface, which is the neural plate formed by the ectoderm (Meulemans and Bronner-Fraser, 2004). During the neural development stage, both sides of the neural fold rise and gradually fuse from the front to the back. During this process of neural plate forming the neural tube, a group of neuroepithelial cells at the edge of both sides of the neural plate are separated from the dorsal wall of the neural tube to form a longitudinal strip of cells, which is clearly distinguished from the neural tube and epithelial cells that cover it; this strip is called the neural crest (Mayor and Theveneau, 2013). In subsequent developmental steps, the neural tube forms the entire CNS, whereas neural crest cells (NCCs) can differentiate into sensory neurons and Schwann cells in the peripheral nervous system and into a variety of specific cells, including smooth muscle cells and melanocytes (Bhatt et al., 2013). A single-cell lineage analysis showed that individual cells within the dorsal neural tube can contribute to both CNS- and neural crest-derived tissues, indicating that during the developmental process, the original neuroectodermal cells can differentiate into the neural tube and neural crest, which exhibit different properties (Bronner-Fraser and Fraser, 1988). However, the regulatory mechanism that controls the differentiation of neuroectodermal cells into

the neural tube and neural crest during this developmental process remains unknown.

MicroRNAs (miRNAs) are a group of small RNA molecules that can specifically bind to the 3' UTR or coding regions of target gene mRNA to negatively regulate target genes at the post-transcription level (Hobert, 2008). An increasing number of studies have shown that miRNAs play an important role in the regulation of cell differentiation during neural development (Fineberg et al., 2009; Shi et al., 2010). For example, miR-9 and miR-124 directly inhibit *Rest* and *Tlx* to promote the differentiation of neural stem cells into neurons (Conaco et al., 2006; Zhao et al., 2009). In the ventral spinal cord, miR-17-3p directly inhibits the transcription factor *Oligo2* to regulate the differentiation of motor neurons and V1 interneurons (Chen et al., 2011). Gessert et al. (2010) showed that the loss of miR-200, miR-96, and miR-196a resulted in differentiation restriction and inhibited the migration of NCCs in *Xenopus*. Moreover, miR-452, which is highly expressed in the neural crest, influences the migration and differentiation of NCCs by regulating epithelial-mesenchymal transition (Sheehy et al., 2010). Thus, it is interesting to study the role of miRNAs in controlling the differentiation of neuroectodermal cells into neural tube epithelial (NTE) cells and NCCs in a neural differentiation system.

Embryonic stem cells (ESCs) are derived from the inner cell mass, and can differentiate into cells of all tissue types in the body and exhibit unlimited self-renewal (Evans and Kaufman, 1981; Thomson et al., 1998). *In vitro*, ESCs can differentiate into NTE cells (Watanabe et al., 2005; Zhang,

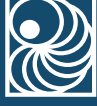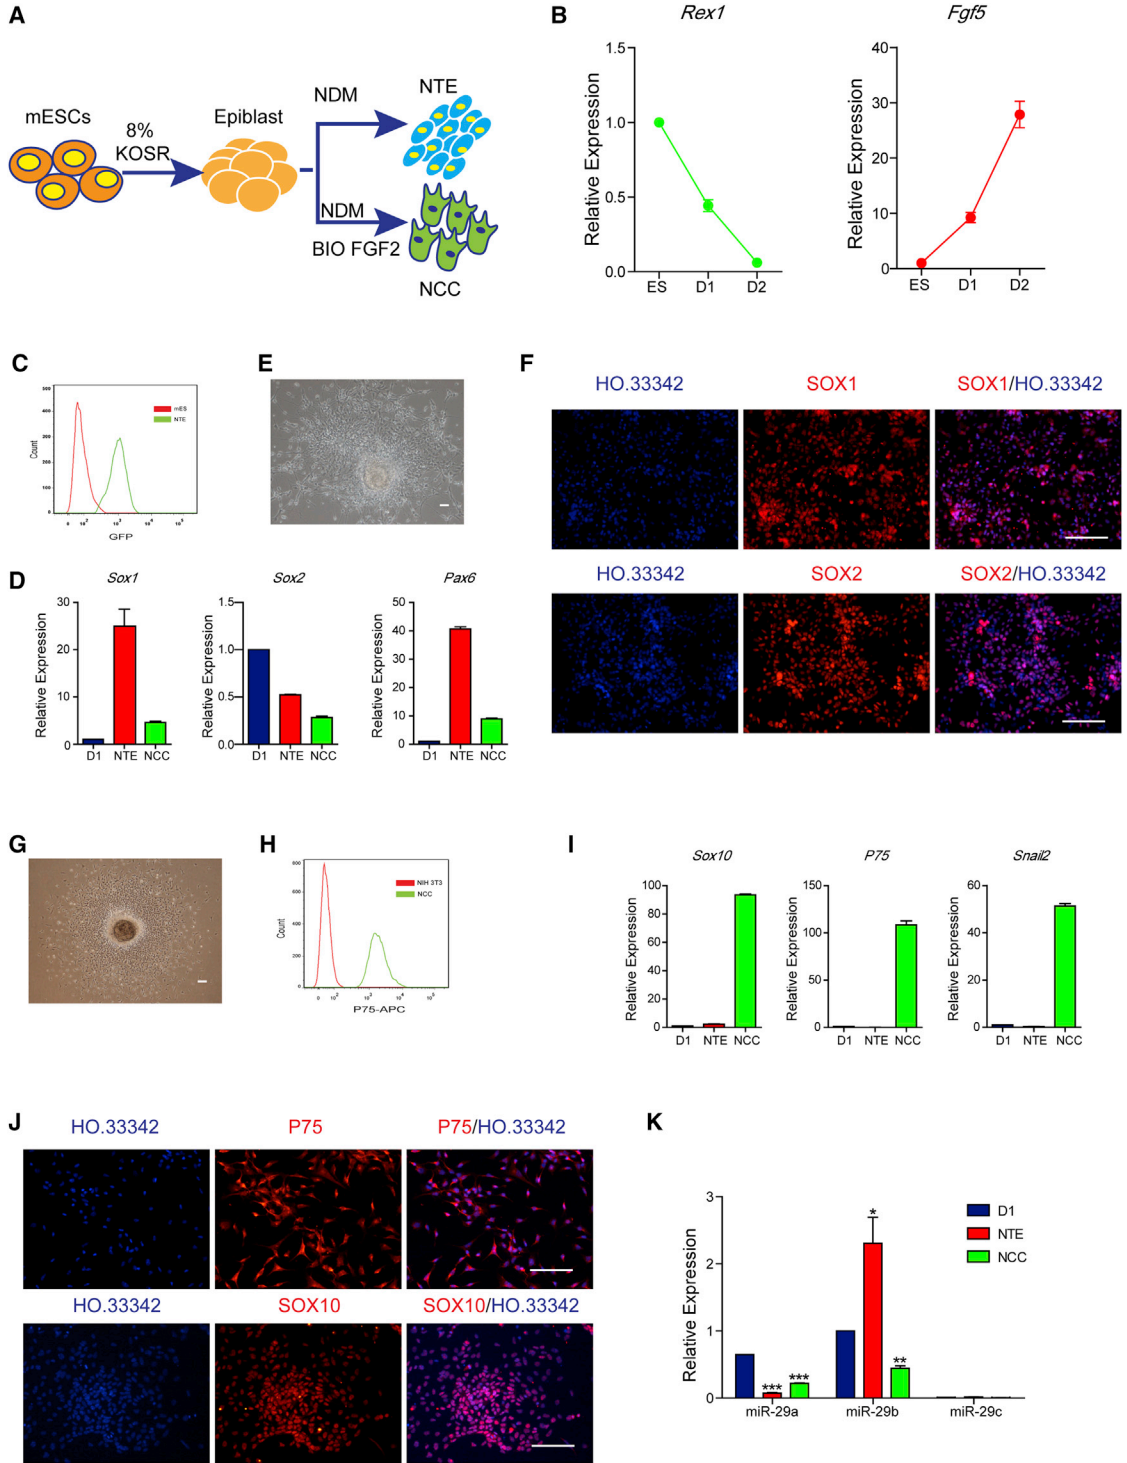

**Figure 1. miR-29b Exhibits a Discriminating Expression Level between NTE Cells and NCCs**

(A) Schematic showing the procedure for mESC differentiation into NTE and NCC.

(B) The expression level of *Rex1* was downregulated and that of *Fgf5* was upregulated as verified by qPCR during the differentiation from embryonic stem cell (ES) to D2.

(C) FACS analyzed the positive ratio of SOX1-GFP of mESC-NTE cells (green line) and undifferentiated ESCs (red line).

(D) The neural lineage-associated genes *Sox1*, *Sox2*, and *Pax6* were upregulated as verified by qPCR in NTE cells.

(legend continued on next page)

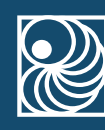

2006) and NCCs (Lee et al., 2007; Liu et al., 2012; Minamino et al., 2015). Therefore, ESCs are an excellent model for the study of early development of the nervous system and the regulatory mechanisms that determine the differentiation of NTE cells and NCCs. Several genes that are critical for the neural differentiation of ESCs and miRNAs that play important roles in the determination of neural differentiation fate have been identified *in vitro*. Specifically, miR-302 and miR-371 family members must be inhibited during neural differentiation, and the overexpression of miR-371 family members blocks neural differentiation (Kim et al., 2011; Rosa and Brivanlou, 2010). Moreover, Du et al. (2013) showed that miR-200 and miR-96 inhibited the neural differentiation of human ESCs (hESCs) by targeting *ZEB* and *PAX6*, respectively.

In this study, we used the differentiation of ESCs into NTE cells and NCCs as a model to show that the expression of miR-29b was upregulated in NTE cells and downregulated in NCCs compared with the initial stage of differentiation. Furthermore, the overexpression of miR-29b promoted the differentiation of ESCs into NTE cells and inhibited differentiation into NCCs. A mechanistic study revealed that miR-29b targets *DNA methyltransferase 3a* (*Dnmt3a*) to regulate neural differentiation. Specifically, the overexpression of *Dnmt3a* during differentiation offset the ability of miR-29b to promote NTE cell differentiation and to inhibit NCC differentiation. In addition, miR-29b also mediated the function of *Pou3f1*, a critical transcription factor in neural differentiation. Specifically, POU3f1 binds upstream of miR-29b to promote the expression of miR-29b, and the inhibition of miR-29b offsets the ability of *Pou3f1* overexpression to promote the differentiation of ESCs into NTE cells.

## RESULTS

### MiR-29b Exhibits a Discriminating Expression Level between NTE Cells and NCCs

To study the regulatory mechanism that determines cell fate at the early stage of neural differentiation of ESCs, we used the 46c cell line to establish NTE and NCC differentiation systems (Figure 1A). After differentiation for 2 days, the ESCs formed embryoid bodies (EBs); in addition, the expression of the pluripotent gene *Rex1* decreased and

the expression of the epiblast-specific gene *Fgf5* was upregulated (Figure 1B), indicating that the cells had already differentiated to epiblast status. After continuous differentiation in neural differentiation medium for 4 days, the EBs could then be differentiated into SOX1-GFP-positive cells. Flow cytometry revealed that the proportion of SOX1-GFP-positive cells reached 93.4% (Figure 1C), and qPCR showed that the *Sox1*, *Sox2*, and *Pax6* genes were upregulated compared with the initial stage of differentiation (day 1 [D1] EBs) (Figure 1D). After the EBs had attached to Matrigel-coated culture dishes, epithelial cells were observed (Figure 1E). Immunofluorescence staining also showed SOX1- and SOX2-positive cells (Figure 1F). These results showed that ESCs differentiated into NTE cells. On D2 of differentiation, EBs were cultured in neural differentiation medium containing a glycogen synthase kinase 3 $\beta$  inhibitor (BIO) and fibroblast growth factor 2 (FGF2) and were allowed to continuously differentiate for 4–6 days. After EBs attached to Matrigel-coated culture dishes, many mesenchymal-like cells were observed migrating out of the spheres (Figure 1G); these cells preferentially adhere to and proliferate on a Matrigel-coated surface, and flow cytometry revealed that these cells were positive for P75 (Figure 1H). qPCR revealed that these cells expressed high levels of the genes *Sox10*, *P75*, and *Snail2* (Figure 1I), and immunofluorescence staining also showed P75- and SOX10-positive cells (Figure 1J), indicating they were NCCs. NTE cells and NCCs expressed miR-29 family members. Specifically, compared with the D1 EBs, miR-29b expression was upregulated in NTE cells and downregulated in NCCs, whereas miR-29a was downregulated in both NTE cells and NCCs, while miR-29c expression was not detected (Figure 1K). The differential expression of miR-29b in NTE cells and NCCs suggested that it might be involved in regulating the differentiation fates of these two types of cells.

### MiR-29b Is Required for NTE Differentiation

To study the effect of miR-29b on the differentiation of ESCs into NTE cells, we used the miRNA sponge strategy, which contains multiple tandem binding sites for a miRNA of interest to compete with target genes for interacting with miRNA (Ebert et al., 2007). Using the site-directed integration method, we established an miR-29b inhibiting cell

(E) The epithelial cells were observed after NTE EBs had attached to a Matrigel-coated surface.

(F) Immunofluorescence assays of SOX1 and SOX2 in NTE cells.

(G) The mesenchymal-like cells were observed to migrate out of the spheres after NCC EBs had attached to a Matrigel-coated surface.

(H) FACS analyzed the positive ratio of P75 of mESC-NCCs (green line) and NIH-3T3 (red line).

(I) The neural crest-associated genes *Sox10*, *P75*, and *Snail2* were upregulated as verified by qPCR in NCCs.

(J) Immunofluorescence assays of P75 and SOX10 in NCCs.

(K) qPCR measured the expression levels of miR-29 family of the NTE cells, NCCs, and D1 EBs.

Means  $\pm$  SEM from  $n = 3$  independent experiments. \* $p < 0.05$ , \*\* $p < 0.01$ , \*\*\* $p < 0.001$  versus the control. Scale bars, 100  $\mu$ m.

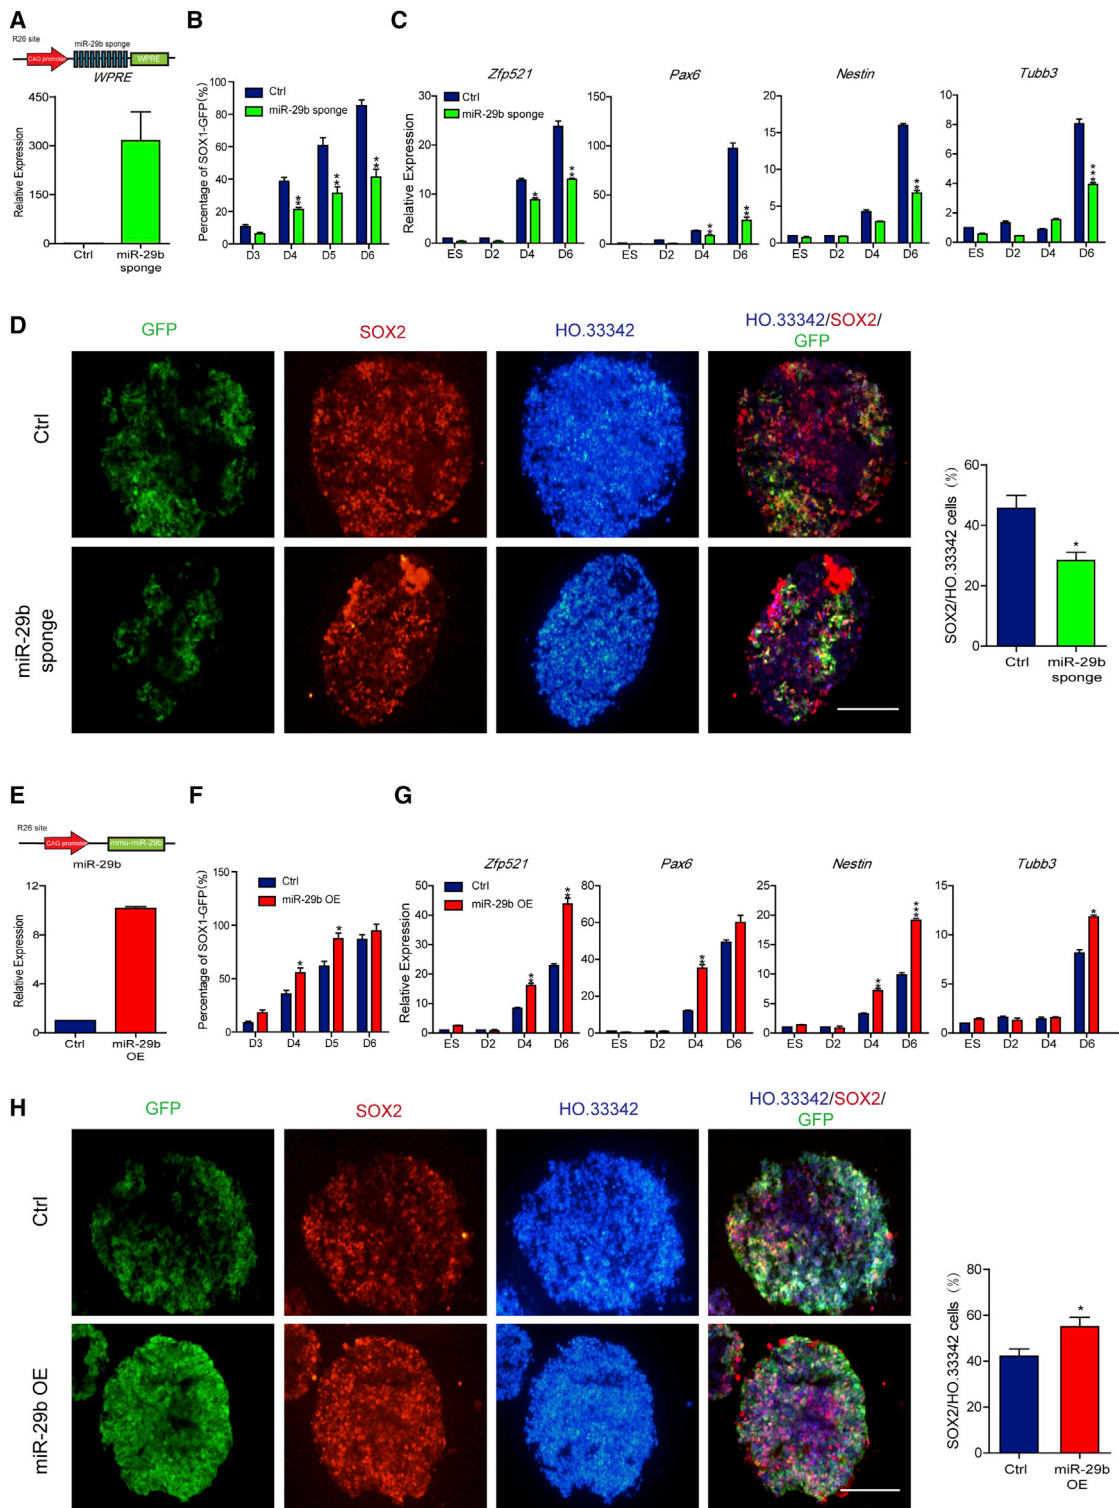

**Figure 2. MiR-29b Is Required for NTE Differentiation**

(A) Diagram of insertion of a CAG promoter driving 10-copy miR-29b sponge into ROSA26 site and the expression level of miR-29b sponge verified by qPCR.

(B–D) Inhibiting miR-29b reduced the efficiency of NTE differentiation, as shown by FACS (B) and qPCR (C) analysis during the NTE differentiation period, and immunofluorescence assays on D5 as well as the quantification of SOX2-positive cells (D).

(legend continued on next page)

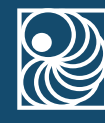

line by inserting a CAG promoter driving ten copies of sponge sequence fused with a *WPRE* sequence into the ROSA26 site. The miR-29b sponge expressed significantly higher level as detected by qPCR for the *WPRE* sequence (Figure 2A). The expression of the miR-29b sponge showed no marked influence on the pluripotency maintenance of ESCs, as comparable expression levels of pluripotent marker genes, such as *Oct4*, *Nanog*, and *Sox2*, were detected in the miR-29b sponge overexpressing ESC line via qPCR (Figure S1A). During NTE differentiation, the proportion of SOX1-GFP-positive cells in the miR-29b sponge group significantly decreased (Figure 2B), and the expression levels of the NTE marker genes *Zfp521*, *Pax6*, *Nestin*, and *Tubb3* significantly decreased (Figure 2C). In addition, immunofluorescence staining showed that the proportions of SOX1-GFP-positive and SOX2-positive cells in the miR-29b sponge group decreased on D5 of differentiation (Figure 2D).

Furthermore, we stably expressed miR-29b in ESCs. A DNA fragment containing the miR-29b sequence driven by the CAG promoter was inserted into the ROSA26 site. The miR-29b overexpressed (OE) ESCs expressed an 8- to 10-fold higher level of miR-29b than control cells as detected by qPCR (Figure 2E). In addition, miR-29b overexpression did not affect the pluripotency maintenance of ESCs, as comparable expression levels of pluripotent marker genes, such as *Oct4*, *Nanog*, and *Sox2*, were detected in the miR-29b OE cell line via qPCR (Figure S1B). During NTE differentiation, the proportion of SOX1-GFP-positive cells in the miR-29b OE group significantly increased (Figure 2F), and the expression levels of the NTE marker genes *Zfp521*, *Pax6*, *Nestin*, and *Tubb3* significantly increased (Figure 2G). In addition, immunofluorescence staining showed that the proportions of SOX1-GFP-positive and SOX2-positive cells in the miR-29b OE group increased on D5 of differentiation (Figure 2H). These results indicated that miR-29b is necessary for NTE differentiation and that the overexpression of miR-29b promotes NTE differentiation.

### miR-29b Inhibits NCC Differentiation

We also studied the ability of miR-29b to regulate the differentiation of ESCs into NCCs. On D4 of differentiation, we measured the expression of the early NCC transcription factor *FoxD3* in EB sections. Compared with the control group, the miR-29b OE group exhibited a significant decrease in the number of FOXD3-positive cells (Figure 3A),

whereas the miR-29b sponge group showed an increase in the number of FOXD3-positive cells (Figure 3B). After the cells attached to Matrigel-coated culture dishes, many mesenchymal-like cells were observed migrating out from the EBs in the miR-29b sponge group, whereas the migrating cells in the miR-29b OE group were primarily neuronal-like cells. On D10, we measured the expression of the NCC-specific transcription factor *Sox10* in migrating cells. We found that the number of SOX10-positive cells in the miR-29b OE group significantly decreased (Figure 3C) and that the number of SOX10-positive cells in the miR-29b sponge group increased (Figure 3D). On D12, we measured the expression of the mature NCC marker gene *P75* and found that the number of P75-positive cells in the miR-29b OE group significantly decreased (Figure 3E), whereas the number of P75-positive cells in the miR-29b sponge group increased (Figure 3F). The decreased expression levels of *P75* and *Snail2* in miR-29b OE cells were consistent with the immunofluorescence results (Figure 3G). In addition, we found significantly increased expression levels of *P75* and *Snail2* in the miR-29b sponge group (Figure 3H). Therefore, we concluded that miR-29b inhibits the differentiation of ESCs into NCCs and that the inhibition of miR-29b by the sponge strategy promoted the differentiation of NCCs.

### miR-29b Affects Fate Determination between NTE Cells and NCCs by Targeting *Dnmt3a*

*Dnmt3a* and *Dnmt3b* are considered the most important miR-29b target genes (Cicchini et al., 2015; Guo et al., 2013; Meunier et al., 2012). Therefore, we first detected the expression levels of *Dnmt3a* and *Dnmt3b* during the differentiation of ESCs into NTE cells and NCCs. The western blotting results showed that the protein level of DNMT3A increased on D2 of differentiation and subsequently decreased during NTE differentiation, whereas DNMT3A was continuously expressed during NCC differentiation (Figure S2A). The protein level of DNMT3B increased on D2 of NTE and NCC differentiation and then subsequently decreased (Figure S2A). To assess whether the effect of miR-29b was mediated by *Dnmt3a* and *Dnmt3b*, the protein levels of these DNMTs were measured after the inhibition and overexpression of miR-29b during NTE and NCC differentiation. Compared with the control group, the miR-29b sponge group exhibited a significant increase in DNMT3A expression and no change in DNMT3B expression (Figure 4A); conversely, DNMT3A expression decreased, and

(E) Diagram of insertion of a CAG promoter driving miR-29b cassette into ROSA26 site and the overexpression efficiency of miR-29b verified by qPCR.

(F–H) Overexpressing miR-29b improved the efficiency of NTE differentiation, as shown by FACS (F) and qPCR (G) analysis during the NTE differentiation period, and immunofluorescence assays on D5 as well as the quantification of SOX2-positive cells (H).

Means  $\pm$  SEM from  $n = 3$  independent experiments. \* $p < 0.05$ , \*\* $p < 0.01$ , \*\*\* $p < 0.001$  versus the control. Scale bars, 100  $\mu\text{m}$ .

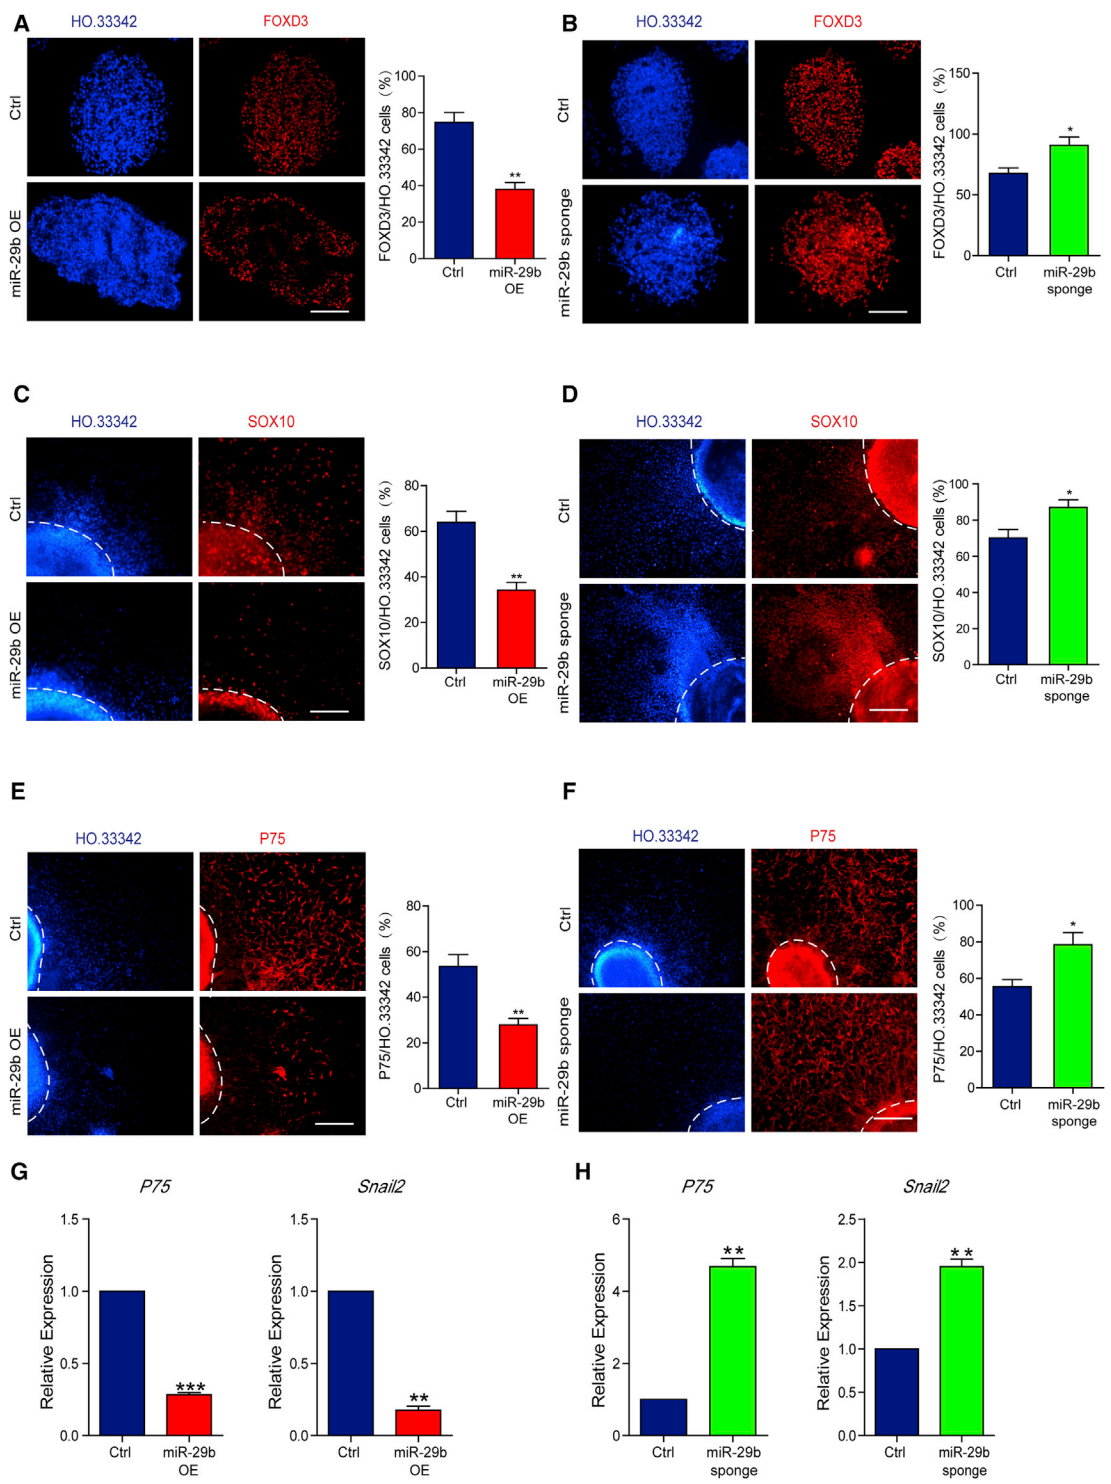

**Figure 3. MiR-29b Inhibits NCC Differentiation**

(A and B) Immunofluorescence assays of FOXD3 on D4 showed that overexpressing miR-29b reduced FOXD3-positive cells (A) and inhibiting miR-29b increased FOXD3-positive cells (B). Quantification of FOXD3-positive cells is shown on the right. (C and D) Immunofluorescence assays of SOX10 on D10 showed that overexpressing miR-29b reduced SOX10-positive cells (C) and inhibiting miR-29b increased SOX10-positive cells (D). The dashed lines indicate the region of the sphere. Quantification of SOX10-positive cells is shown on the right.

(legend continued on next page)



DNMT3B expression remained unchanged in miR-29b OE cells (Figure 4B). Therefore, we speculated that miR-29b may target *Dnmt3a* to regulate differentiation.

As miR-29b has been reported to regulate the Wnt/ $\beta$ -catenin signaling pathway (Kapinas et al., 2010; Shin et al., 2014; Subramanian et al., 2014), which is important for neural crest differentiation (Sauka-Spengler and Bronner-Fraser, 2008) and neurogenesis (Shin et al., 2014), we further investigated the effect of miR-29b on the Wnt/ $\beta$ -catenin signaling pathway during NTE and NCC differentiation. The regulation of Wnt/ $\beta$ -catenin signaling by miR-29b was evaluated by using a TOPFlash/FOPFlash reporter system (Veeman et al., 2003) and by detecting the expression levels of total and active  $\beta$ -catenin protein (CTNNB1). TOPFlash activity was increased in NCC differentiation compared with NTE differentiation, and neither overexpression nor inhibition of miR-29b affected TOPFlash activity (Figure S2B). The western blotting results showed that total and active CTNNB1 expression levels were not affected by overexpression or inhibition of miR-29b during NCC differentiation (Figures S2C and S2D). These results indicated that miR-29b may not regulate the Wnt/ $\beta$ -catenin signaling pathway during the early stage of neural differentiation.

To confirm that miR-29b targets *Dnmt3a* to regulate differentiation, we infected cells in the miR-29b sponge group with plko-sh*Dnmt3a* lentiviruses to establish a miR-29b sponge-sh*Dnmt3a* cell line. Knockdown was validated by measuring the protein level of DNMT3A via western blotting (Figure S2E). During differentiation into NTE cells, *Dnmt3a* knockdown offset the inhibition of NTE differentiation after the suppression of miR-29b. The number of SOX1-GFP-positive cells in the miR-29b sponge-sh*Dnmt3a* group significantly increased compared with those in the miR-29b sponge group (Figure 4C). Furthermore, the expression levels of the neural differentiation-related genes *Zfp521*, *Pax6*, *Nestin*, and *Tubb3* in the miR-29b sponge-sh*Dnmt3a* group significantly increased compared with those in the miR-29b sponge group (Figure 4D). Immunofluorescence staining on D5 of differentiation also confirmed that the proportions of SOX1-GFP-positive and SOX2-positive cells significantly increased in the miR-29b sponge-sh*Dnmt3a* group (Figure 4E). These results indicated that *Dnmt3a* knockdown offset the inhibition of NTE differentiation following the suppression of miR-29b.

Furthermore, we established an miR-29b OE-*Dnmt3a* cell line that overexpressed *Dnmt3a* in the miR-29b OE group. The overexpression of DNMT3A was validated via western blotting (Figure S2F). During differentiation into NTE cells, *Dnmt3a* overexpression offset the promotion of NTE differentiation by miR-29b. The number of SOX1-GFP-positive cells in the miR-29b OE-*Dnmt3a* group significantly decreased compared with that in the miR-29b OE group (Figure 4F). Furthermore, the expression levels of the neural differentiation-related genes *Zfp521*, *Pax6*, *Nestin*, and *Tubb3* in the miR-29b OE-*Dnmt3a* group significantly decreased compared with those in the miR-29b OE group (Figure 4G). Immunofluorescence staining on D5 of differentiation also confirmed that the proportions of SOX1-GFP-positive and SOX2-positive cells significantly decreased in the miR-29b OE-*Dnmt3a* group compared with the miR-29b OE group (Figure 4H). Moreover, *Dnmt3a* overexpression offset the inhibition of NCC differentiation by miR-29b. Immunofluorescence staining on D12 of differentiation showed that compared with the miR-29b OE group, the miR-29b OE-*Dnmt3a* group exhibited a significant increase in the number of P75-positive cells (Figure 4I). These results indicated that miR-29b regulates the fate of ESC differentiation into NTE cells and NCCs by targeting *Dnmt3a*.

### miR-29b Acts Downstream of *Pou3f1* to Drive Mouse ESCs into the NTE Lineage

To identify upstream transcription factors that regulate miR-29b, we used a pGL3 luciferase plasmid containing the 3-kb region upstream of the miR-29b to identify transcription factors that are upregulated in NTE cells and activate miR-29b. The results showed that *Pou3f1* and *Sox2* enhanced the luciferase activity (Figure 5A). Chromatin immunoprecipitation (ChIP) experimental results indicated that POU3F1 bound at the upstream region of miR-29b, whereas the binding of SOX2 was not detected (Figure S3A). Furthermore, we established ESC lines in which either *Pou3f1* or *Sox2* was knocked down. After 2 days of differentiation, *Sox2* knockdown did not affect miR-29b expression (Figure S3B), whereas *Pou3f1* knockdown reduced miR-29b expression (Figure 5B) and increased the protein level of DNMT3A (Figure 5C). We also found the transcriptional activity of *Pou3f1* depended on its POU

(E and F) Immunofluorescence assays of P75 on D12 showed that overexpressing miR-29b reduced P75-positive cells (E) and inhibiting miR-29b increased P75-positive cells (F). The dashed lines indicate the region of the sphere. Quantification of P75-positive cells is shown on the right.

(G and H) qPCR measured the mRNA levels of NCC markers *P75* and *Snail2* on D12 of NCC differentiation cells, and showed that overexpressing miR-29b decreased the expression levels of neural crest-related genes (G) and inhibiting miR-29b increased the expression levels of neural crest-related genes (H).

Means  $\pm$  SEM from  $n = 3$  independent experiments. \* $p < 0.05$ , \*\* $p < 0.01$ , \*\*\* $p < 0.001$  versus the control. Scale bars, 100  $\mu$ m.

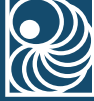

domain, as *Pou3f1* $\Delta$ POU lost the ability to stimulate luciferase expression (Figure S3C).

To further examine the potential site that was essential for POU3F1-activated transcription, we used MAST (Motif Alignment and Search Tool) (Bailey et al., 2009) to analyze the miR-29b upstream region with the POU3F1 DNA-binding motif (Figure S3D) from the UniPROBE database (Hume et al., 2015). A potential POU3F1-binding site has been identified, located in the upstream of miR-29b (–1,539 to –1,518 bp region) (Figure S3E). Based on this analysis, we divided the miR-29b upstream region into three fragments, including fragment A (–3,000 to –2,001 bp), fragment B (–2,000 to –1,001 bp), and fragment C (–1,000 to –1 bp). We then inserted these fragments into pGL3 vectors and performed co-transfection with *Pou3f1* for a luciferase assay. The results showed that only fragment B containing this predicted POU3F1-binding site conferred peak transcriptional activity (Figure 5D), whereas fragments A and C had negligible effects. Deletion of a 100-bp region (–1,580 to –1,481) around this site in fragment B negated the activation effect of POU3F1 (Figure 5D). ChIP experimental results showed that in the upstream region of the miR-29b, only the region that contained predicated POU3F1-binding site was enriched in POU3F1 immunoprecipitates, whereas the binding of POU3F1 was not detected in the nearby regions (Figures 5E and S3F). The same region was also enriched for the promoter-specific histone modification H3K4me3 and H3K9Ac (Agalioti et al., 2002; Guenther et al., 2007; Seila et al., 2008; Wang et al., 2008), indicating that this region was the promoter of miR-29b and that POU3F1 directly bound to the promoter of miR-29b (Figure S3G). Therefore, we hypothesized that miR-29b is regulated by *Pou3f1* during neural differentiation.

To further study the effect of *Pou3f1* on miR-29b-mediated regulation of neural differentiation, we established an ESC line in which *Pou3f1* or *Pou3f1* $\Delta$ POU expression could be induced by doxycycline (Dox) (Figure S3H). During differentiation, induced *Pou3f1* expression activated miR-29b expression and accordingly decreased the protein level of DNMT3A in both NTE (Figure 5F) and NCC (Figure 5G) differentiation, whereas *Pou3f1* $\Delta$ POU had no effect on the activation of miR-29b expression (Figure S3I). Induced *Pou3f1* expression promoted NTE differentiation and increased *Pax6*, *Sox1*, and *Zfp521* expression levels (Figure 5H), while overexpression of *Pou3f1* $\Delta$ POU did not show this effect (Figure S3J). Accordingly, the inhibition of miR-29b via the overexpression of the miR-29b sponge offset the promotion of NTE differentiation by *Pou3f1* overexpression. Specifically, qPCR results showed that *Pax6*, *Sox1*, and *Zfp521* expression levels decreased (Figure 5H), the immunofluorescence staining results also showed that the proportions of SOX1-GFP-positive and SOX2-positive cells decreased on D5 of differentiation in the tet-on

*Pou3f1* + Dox CAG-29b sponge group compared with the tet-on *Pou3f1* + Dox group (Figure 5I). The number of SOX1-GFP-positive cells in the tet-on *Pou3f1* + Dox CAG-29b sponge group was significantly decreased compared with that in the tet-on *Pou3f1* + Dox group (Figure 5J). During differentiation into NCCs, Dox-induced expression of *Pou3f1* decreased the expression levels of both *P75* and *Snail2* (Figure 5K). The immunofluorescence results showed that the number of migrating P75-positive NCCs significantly decreased, indicating that *Pou3f1* inhibited NCC differentiation (Figure 5L). Therefore, the expression levels of both *P75* and *Snail2* significantly increased when miR-29b was suppressed by the overexpression of the miR-29b sponge (Figure 5K). Immunofluorescence staining also showed that the number of P75-positive cells recovered (Figure 5L). Our results indicated that *Pou3f1* activates miR-29b and regulates neural differentiation via miR-29b. The ability of *Pou3f1* to promote NTE differentiation was offset by the inhibition of miR-29b, whereas the inhibition of miR-29b also offset the inhibition of NCC differentiation by *Pou3f1*.

### MiR-29b Regulates NTE versus NCC Fate Decision in hESC Neural Differentiation

After showing that miR-29b regulates cell fate at the early stage of neural differentiation in mouse ESCs (mESCs), we attempted to recapitulate this effect in hESCs. Based on a reported method (Zhang et al., 2001; Liu et al., 2012), we differentiated hESCs into NTE cells and NCCs. The hESCs were maintained on mouse embryonic fibroblast (MEF) feeders and exhibited an undifferentiated phenotype. The hESCs were detached from MEFs and formed EBs to initiate the differentiation process (Figure S4A). For NTE differentiation, the EBs adhered to the culture surface from D7 and formed a rosette-like structure (Figure S4B); these columnar epithelial cells expressed PAX6 and SOX1 and were NTE cells (Figure 6A). For NCC differentiation, FGF2 and BIO were added to the culture medium at D4–D10. After the EBs were attached to the Matrigel-coated dishes, cells with a stellate morphology migrated out of the spheres (Figure S4C). These cells expressed P75 and SOX10 and were therefore NCCs (Figure 6B). In addition, miR-29b expression was upregulated in NTE cells and downregulated in NCCs compared with that in D1 EBs (Figure 6C). To study the regulatory function of miR-29b during the neural differentiation of hESCs, we used a site-directed integration method to insert a CAG promoter driving ten copies of sponge sequences fused with *WPRES* sequences into the AAVS1 site, and established an H9 miR-29b inhibiting cell line. The expression level of the *WPRES* in the miR-29b sponge was detected by qPCR (Figure S4D), and inhibition of miR-29b had no influence on the pluripotency maintenance of hESCs (Figure S4E). We also found that



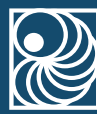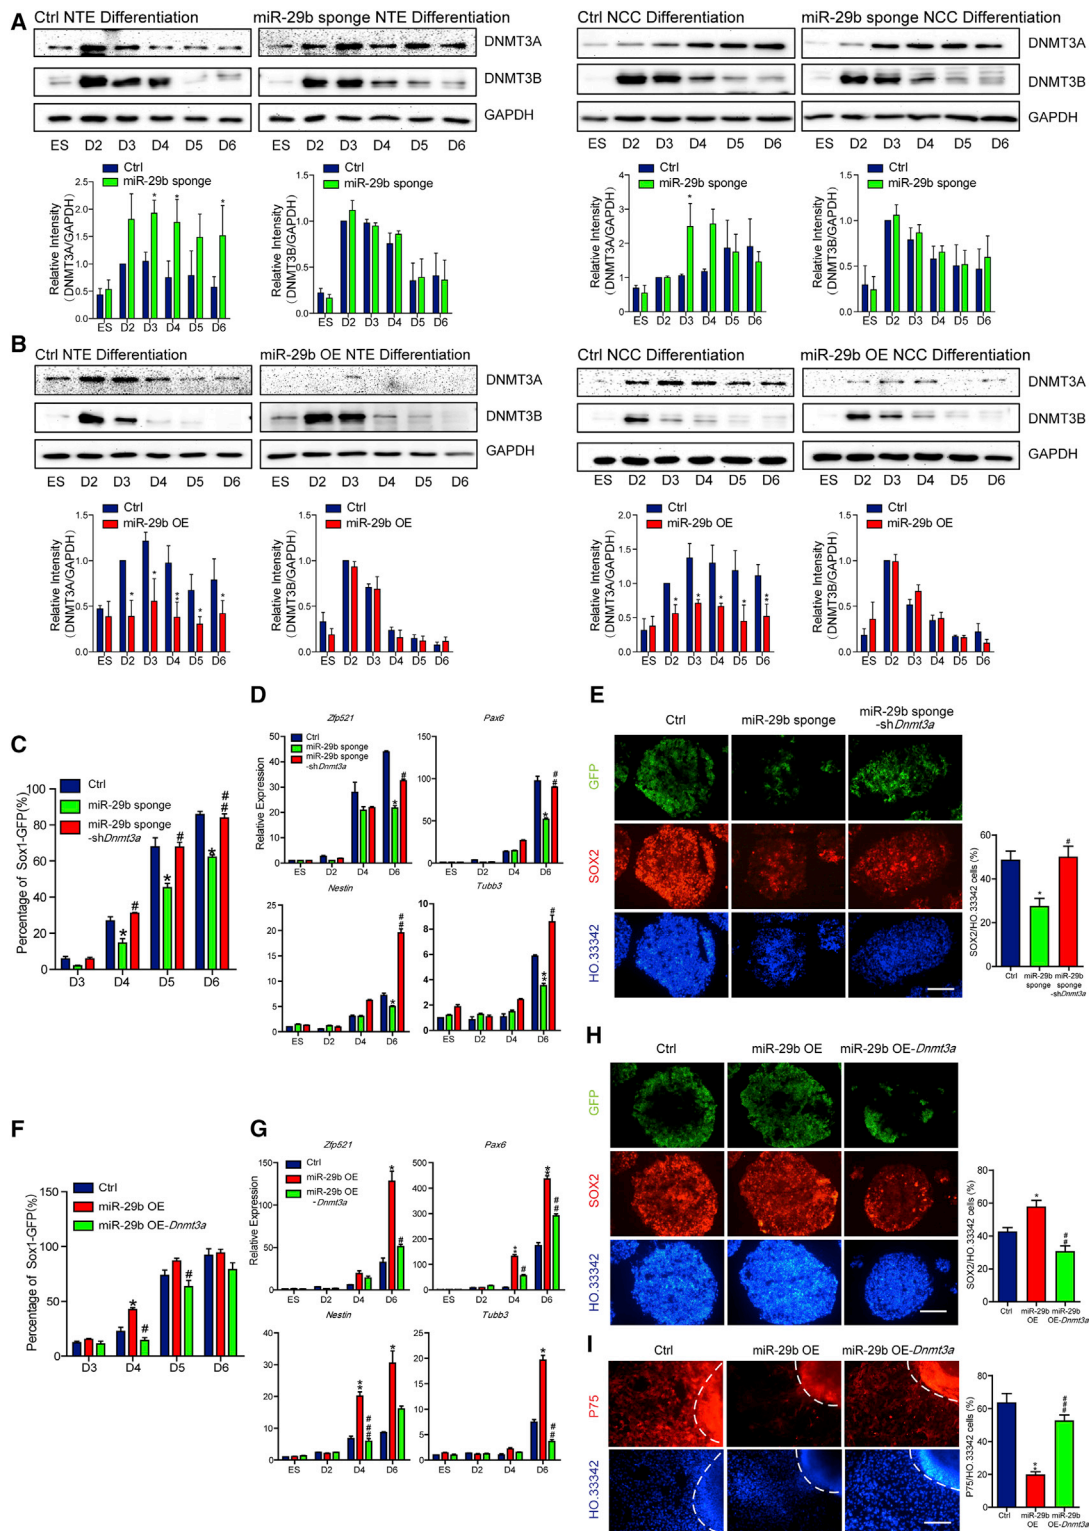

**Figure 4. MiR-29b Affects Fate Determination between NTE Cells and NCCs by Targeting *Dnmt3a***

(A and B) Western blotting analyzed the protein levels of DNMT3A and DNMT3B in control (Ctrl) and miR-29b sponge cell line (A) or Ctrl and miR-29b OE cell line (B) during NTE and NCC differentiation. GAPDH is the normalization control. The protein abundance of DNMT3A and DNMT3B was quantified with normalization by signals of GAPDH.

(legend continued on next page)



DNMT3A expression level increased in H9 miR-29b sponge cells (Figure S4F). On D12 of NTE differentiation, the expression levels of the NTE marker genes *ZNF521*, *PAX6*, and *SOX1* in the H9 miR-29b sponge group were significantly lower than the levels of the control group (Figure 6D). In addition, immunofluorescence staining showed that the proportions of PAX6 and SOX1 in the H9 miR-29b sponge group decreased (Figure 6E). In addition, on D12 of NCC differentiation, neural crest-related gene expression was assessed using qPCR, revealing that *SOX10*, *P75*, and *SNAIL2* expression levels were increased compared with the levels in control cells (Figure 6F). Moreover, immunofluorescence staining also showed that the proportions of SOX10- and P75-positive cells increased in the H9 miR-29b sponge group (Figures 6G and 6H).

Furthermore, by inserting a DNA fragment containing the miR-29b sequence driven by the CAG promoter into the AAVS1 site, we stably expressed miR-29b in hESCs. In these cells miR-29b expression was upregulated, as measured by qPCR (Figure S4G), and overexpression of miR-29b did not affect hESC pluripotency (Figure S4H). DNMT3A expression was decreased, as detected by western blotting (Figure S4I). After 12 days of NTE differentiation, the expression levels of the NTE marker genes *ZNF521*, *PAX6*, and *SOX1* in the H9 miR-29b OE group significantly increased compared with those in the control group (Figure 6I). In addition, immunofluorescence staining showed that the proportions of PAX6 and SOX1 in the H9 miR-29b OE group increased (Figure 6J). Moreover, on D12 of NCC differentiation, qPCR was used to detect neural crest-related gene expression and revealed that *SOX10*, *P75*, and *SNAIL2* expression levels decreased compared with the levels in the control group (Figure 6K). Immunofluorescence staining also showed that the proportions of SOX10- and P75-positive cells decreased in the H9 miR-29b OE group (Figures 6L and 6M). These results indicated that miR-29b also promotes NTE cell differentiation and inhibits NCC differentiation during the neural differentiation of hESCs.

## DISCUSSION

Previous studies on the determination of cell fate during the early stage of neural differentiation mainly focused

on signaling pathways and transcription factors. FGF, BMP, and Wnt signaling pathway were shown to be very important in neural crest differentiation (Sauka-Spengler and Bronner-Fraser, 2008). Two groups of transcription factors, neural plate border specifier genes (*Msx1*, *Pax3*, *Pax7*, and *Zic1*) and NCC specifier genes (*SoxE*, *FoxD3*, *Snail1*, and *Snail2*), mediated the upstream signals and regulated the occurrence, development, migration, and differentiation of NCCs (Meulemans and Bronner-Fraser, 2004). However, little is known regarding the function of non-coding RNAs, a large group of RNAs, in this process. We differentiated ESCs into NTE cells and NCCs and showed that miR-29b is an important molecule in the determination of neural tube versus neural crest fate during neural differentiation.

MiR-29b has been shown to target many molecules and regulate signaling pathways (Cheng et al., 2013; Leone et al., 2012; Tu et al., 2015; Vitiello et al., 2016; Xu et al., 2014). Previous studies showed miR-29b could either activate or negatively regulate the canonical Wnt signaling pathway (Kapinas et al., 2010; Subramanian et al., 2014). Significant upregulation of miR-29b has been found in neural stem cells and promotes neurogenesis through regulation of the canonical Wnt signaling pathway (Shin et al., 2014). In our study, using a TOPFlash/FOPFlash reporter system and detecting the protein levels of total and active CTNNB1 by western blotting, we found that during NTE and NCC differentiation, neither overexpression nor inhibition miR-29b affected the activation of the Wnt/ $\beta$ -catenin signaling pathway, indicating that miR-29b acts in a context-dependent manner and does not regulate Wnt/ $\beta$ -catenin signaling during the early stage of neural differentiation.

*Dnmt3a* and *Dnmt3b* are the most commonly reported molecules targeted by miR-29b (Cicchini et al., 2015; Guo et al., 2013). Our studies showed that during neural differentiation, miR-29b inhibits *Dnmt3a* expression to promote NTE cell differentiation and inhibit NCC differentiation but does not significantly affect the expression of *Dnmt3b*. This result was consistent with the results of previous studies of neural differentiation and neural development. Specifically, Martins-Taylor et al. (2012) showed that *Dnmt3b* knockout during ESC differentiation accelerated NTE cell and NCC differentiation. *Dnmt3b* knockout in *Wnt1-cre* and *Sox10-cre* mice had little influence on the

(C–E) Knocking down *Dnmt3a* rescued the defection of NTE differentiation by inhibiting miR-29b, as shown by FACS (C) and qPCR (D) during NTE differentiation, and immunofluorescence on D5 of NTE differentiation EBs as well as the quantification of SOX2-positive cells (E).

(F–H) Overexpressing *Dnmt3a* offset the promotion of NTE differentiation by miR-29b, as shown by FACS (F) and qPCR (G) during NTE differentiation, and immunofluorescence on D5 of NTE differentiation EBs as well as the quantification of SOX2-positive cells (H).

(I) Immunofluorescence assays of P75 on D12 of NCC differentiation cells showed that overexpressing *Dnmt3a* rescued the defection of NCC differentiation by miR-29b. The dashed lines indicate the region of the sphere.

Means  $\pm$  SEM from  $n = 3$  independent experiments. \* $p < 0.05$ , \*\* $p < 0.01$  versus the control; # $p < 0.05$ , ## $p < 0.01$ , ### $p < 0.001$  versus the miR-29b sponge group (C–E) or miR-29b OE group (F–I). Scale bars, 100  $\mu\text{m}$ .

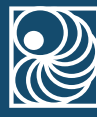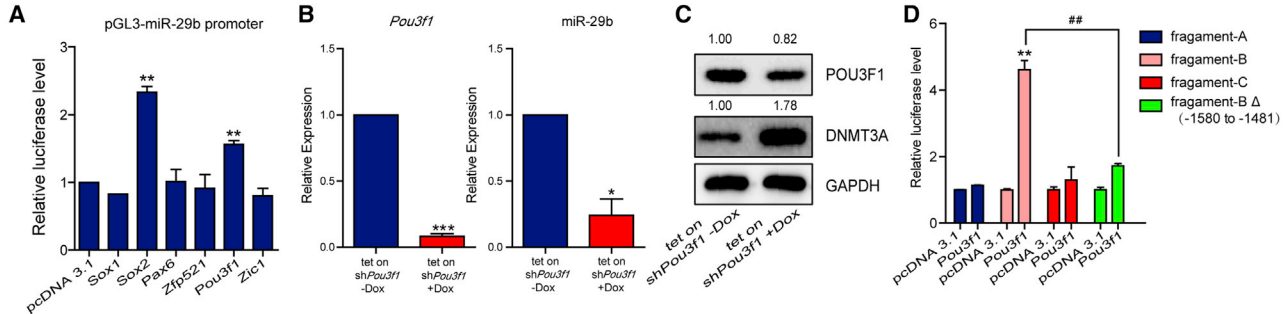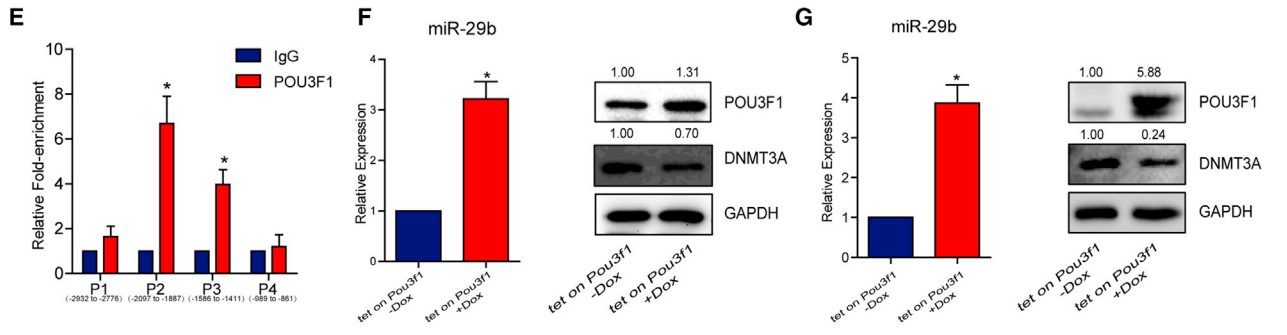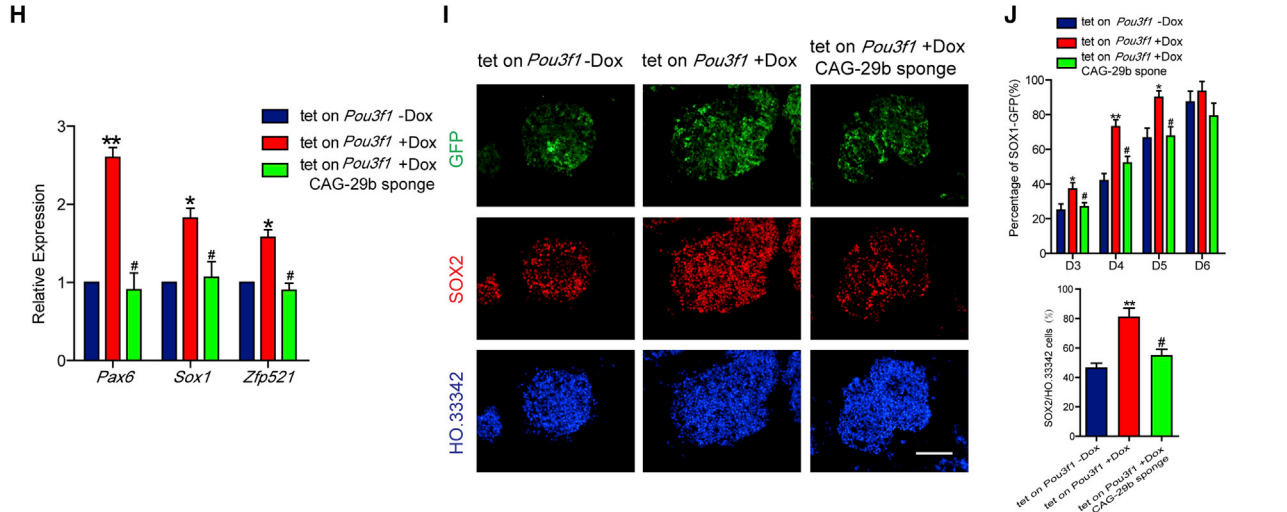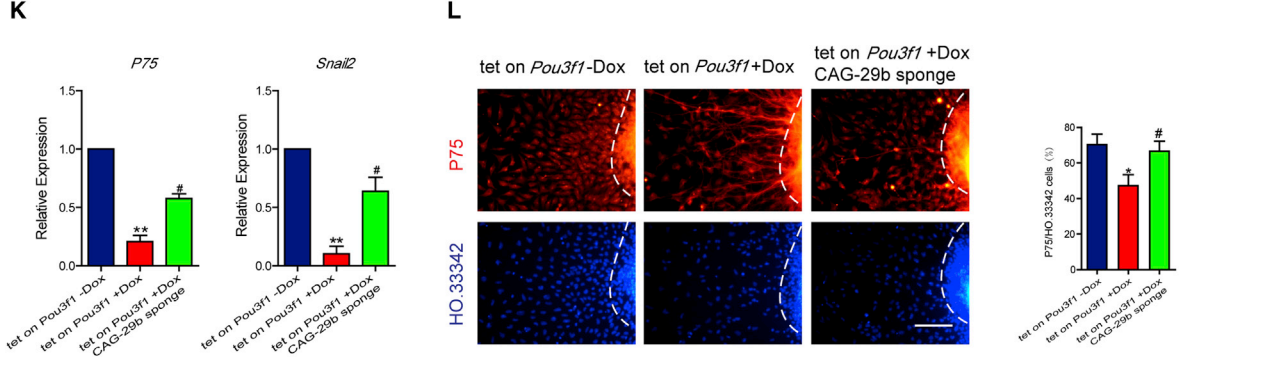

(legend on next page)



specification of NCCs and only slightly affected the migration of SOX10-positive cells (Jacques-Fricke et al., 2012). Unlike the dispensable role of *Dnmt3b* in neural crest differentiation, Hu et al. (2012) showed that the inhibition of *Dnmt3a* significantly affected neural crest development but did not affect neural tube development during the development of chick embryos. Therefore, *Dnmt3a* is considered a critical molecule in the regulation of neural tube versus neural crest fate. However, the mechanism responsible for regulating the expression of *Dnmt3a* during neural development remains poorly understood. miR-29b, which is highly expressed in NTE cells, targets and inhibits *Dnmt3a* expression, thus ensuring the differentiation fate of the neural tube.

*Pou3f1*, an important transcription factor at the initial stage of neural development that is highly expressed in the early stage of the neuroectoderm, activated miR-29b during differentiation. Loss of *Pou3f1* during mESC differentiation caused cells to remain at the epiblast stage, whereas overexpression of *Pou3f1* promoted the neural differentiation of mESCs. Further studies indicated that POU3F1 could bind to the promoter regions of *Zfp521* and *Pax6* to activate the expression of *Zfp521* and *Pax6*, thus initiating neural differentiation (Zhu et al., 2014). Our study showed that *Pou3f1* also regulates neural differentiation by regulating miR-29b expression. The ChIP experimental results showed that POU3F1 directly bound at the promoter region of miR-29b; *Pou3f1* overexpression activated the expression of miR-29b, and *Pou3f1* knockdown significantly decreased the expression of miR-29b. Moreover, the overexpression of *Pou3f1* inhibited neural crest differentiation, and this function was offset by inhibition of miR-29b. Therefore, our results demonstrated that the *Pou3f1*-miR-29b-*Dnmt3a* regulatory axis was active at

the initial stage of neural differentiation and regulated the differentiation fate of cells. Specifically, the high level of *Pou3f1* expression in NTE cells induced miR-29b to inhibit *Dnmt3a* and block neuroepithelial cells from differentiating into NCCs, thus ensuring NTE differentiation.

The upstream regions of miRNAs include binding sites for a variety of transcription factors, and various molecules regulate miRNAs in different cells and biological processes. Accordingly, miR-29b is also regulated by many types of signals and transcription factors. During somatic cell reprogramming, miR-29b is regulated by the pluripotent gene *Sox2*. *Sox2* also inhibits *Dnmt3a* via miR-29b to promote the formation of reprogrammed pluripotent stem cells (Guo et al., 2013). Our current study showed that during neural differentiation, *Sox2* expressed in NTE cells did not bind to the upstream region of miR-29b, indicating that miR-29b could be regulated by different transcription factors in different biological processes.

ESCs exhibit multidirectional differentiation and are an excellent model for *in vitro* developmental studies. Studying the neural differentiation of hESCs can help elucidate the developmental and regulatory mechanisms of the human nervous system (Bajpai et al., 2010; Zhang, 2006). During the differentiation of hESCs into NTE cells and NCCs, miR-29b regulates cell fate determination between NTE cells and NCCs by regulating *DNMT3a* expression. This result was consistent with the regulation of neural differentiation by miR-29b in mESCs, which revealed that the mechanism of miR-29b that determines cell fate at the early stage of neural differentiation is conserved.

This study confirmed that miR-29b regulates the differentiation fates of NTE cells and NCCs during the neural differentiation of ESCs and elucidated the synergistic function of the *Pou3f1*-miR-29b-*Dnmt3a* regulatory axis in the

### Figure 5. miR-29b Acts Downstream of *Pou3f1* to Drive Mouse ESCs into the NTE Lineage

(A) Luciferase reporter assay in 3T3 cells transfected control (pcDNA3.1), *Sox1*, *Sox2*, *Pax6*, *Zfp521*, *Pou3f1*, and *Zic1*, respectively, with pGL3-miR-29b promoter.

(B and C) qPCR (B) and western blotting (C) in tet-on sh*Pou3f1* cell line with and without Dox showed that *Pou3f1* knockdown reduced the expression of miR-29b and increased the protein level of DNMT3A. The protein abundance of POU3F1 and DNMT3A was quantified with normalization by signals of GAPDH.

(D) Luciferase reporter assay in 3T3 cells transfected control (pcDNA3.1) and *Pou3f1*, respectively, with pGL3 fragments of miR-29b promoter.

(E) ChIP assay showed enrichment of POU3F1 at the promoter region of miR-29b.

(F and G) Western blotting showed increased level of POU3F1 and decreased level of DNMT3A in tet-on *Pou3f1* cell line with and without Dox on D3 of NTE (F) and NCC (G) differentiation. The protein abundance of POU3F1 and DNMT3A was quantified with normalization by signals of GAPDH. Overexpression of *Pou3f1* upregulates the expression level of miR-29b on D3 of NTE (F) and NCC (G) differentiation, as verified by qPCR.

(H–J) Inhibiting miR-29b offset the promotion of NTE differentiation by *Pou3f1*, as shown by qPCR (H), FACS (J), and immunofluorescence (I) as well as the quantification of SOX2-positive cells on D5 of NTE differentiation EBs.

(K and L) Inhibiting miR-29b rescue the defection of NCC differentiation by *Pou3f1*, as shown by qPCR (K) and immunofluorescence as well as quantification of P75-positive cells (L) on D12 of NCC differentiation. The dashed lines indicate the region of the sphere.

Means  $\pm$  SEM of  $n = 3$  independent experiments. \* $p < 0.05$ , \*\* $p < 0.01$ , \*\*\* $p < 0.001$  versus the control; # $p < 0.05$ , ## $p < 0.01$  versus the fragment-B group (D) or tet-on *Pou3f1* + Dox group (H–L). Scale bars, 100  $\mu\text{m}$ .

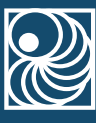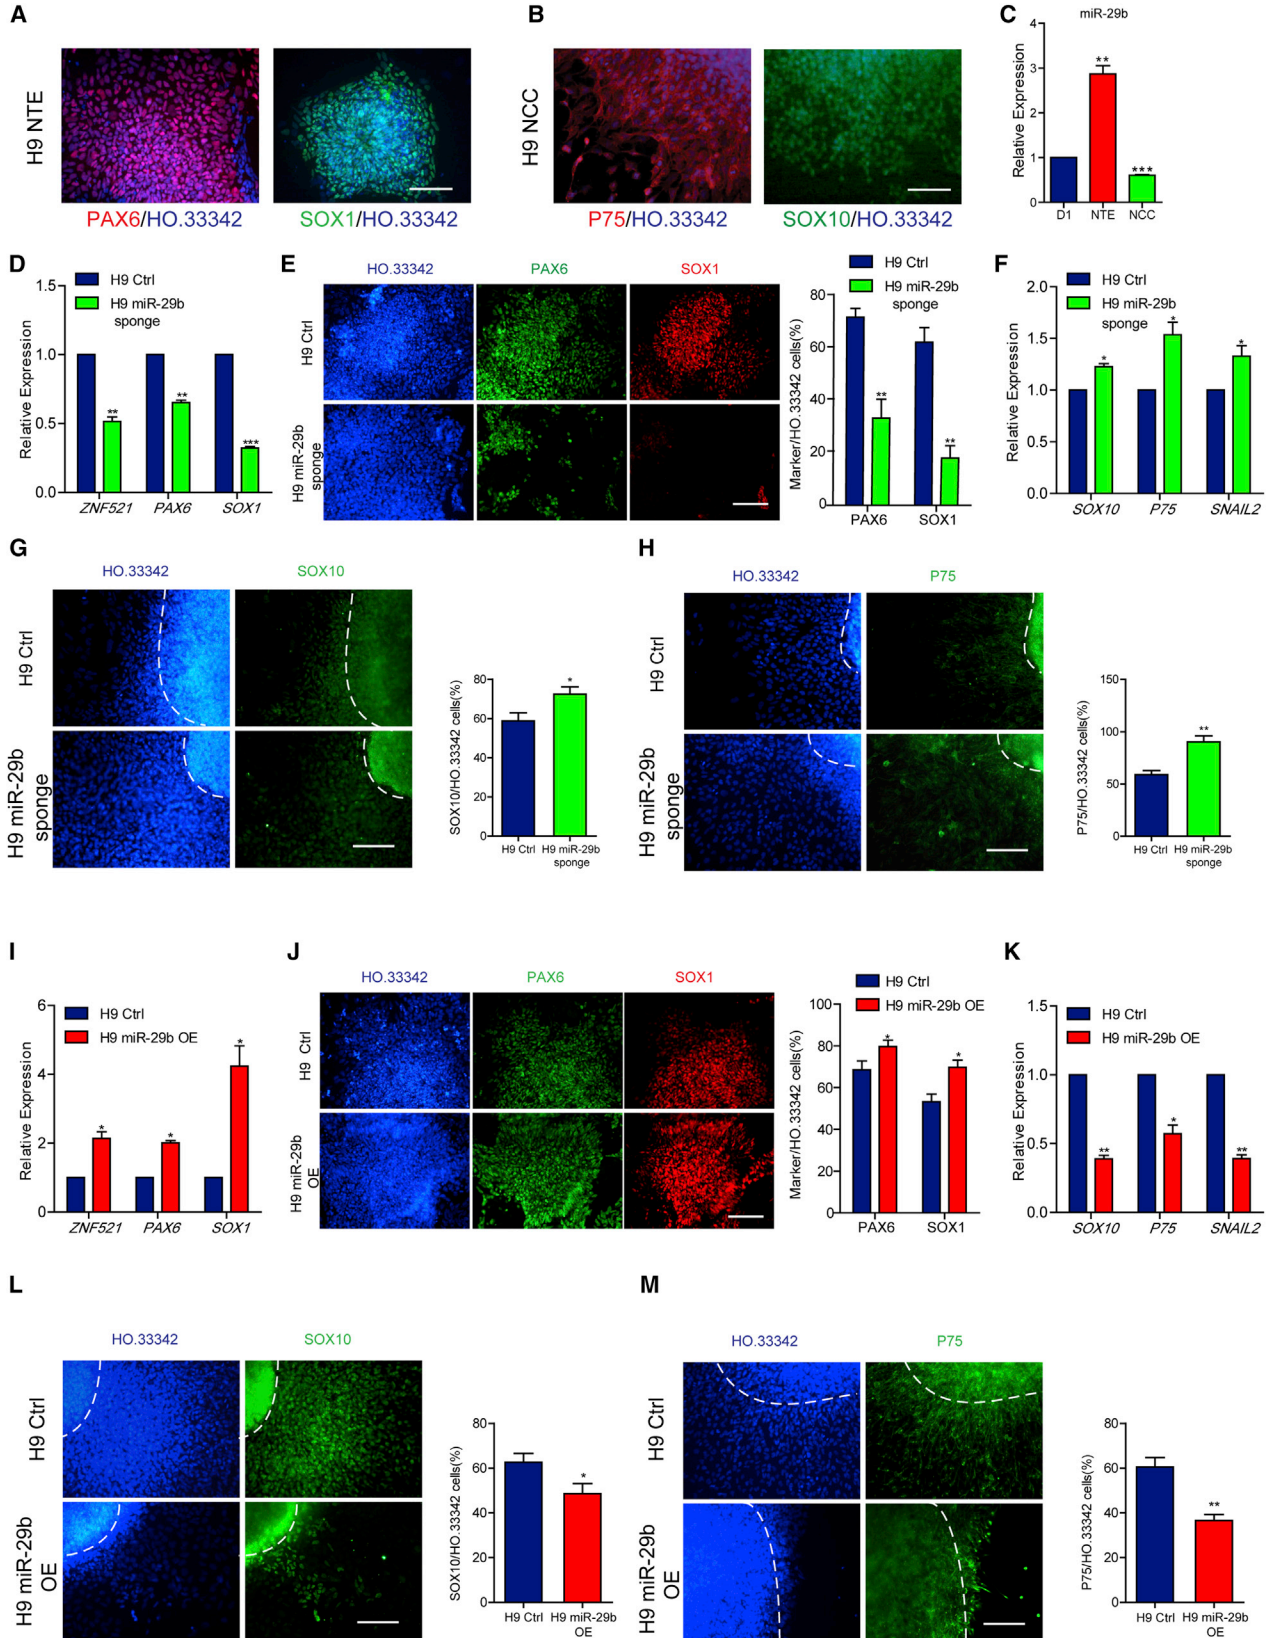

(legend on next page)

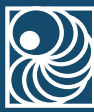

regulation of stem cell differentiation. These results also shed light on the mechanism that regulates neural tube/neural crest fate at the early stage of human neural development.

## EXPERIMENTAL PROCEDURES

### Mouse ESC Culture and Differentiation

The mESC Sox1-GFP (46c) was cultured on a feeder layer. The NTE differentiation was performed according to published protocols (Wang et al., 2011) and the NCC differentiation was performed according to a published protocol (Minamino et al., 2015). For additional details, see [Supplemental Experimental Procedures](#).

### hESC Culture and Differentiation

The culture and NTE differentiation of hESCs was performed according to published protocols (Zhang et al., 2001). The NCC differentiation of hESC was performed according to a published protocol (Liu et al., 2012). For additional details, see [Supplemental Experimental Procedures](#).

### RNA Extraction, cDNA Synthesis, and qPCR Analysis

Total RNA was extracted using RNAiso Plus (TaKaRa). Reverse transcription was performed using a PrimeScript RT reagent kit (TaKaRa) and miRcute miRNA First-Strand cDNA Synthesis Kit (Tiangen). qPCR was performed using a SYBR Premix Ex Taq Kit (TaKaRa) and miRcute miRNA qPCR Detection Kit (Tiangen).

### Statistical Analyses

All statistical data are presented as the mean  $\pm$  SEM of at least three independent experiments. Statistical significance was calculated according to unpaired two-tailed Student's t tests using GraphPad Prism software.  $p < 0.05$  was considered statistically significant. Values are indicated on graphs as \* $p < 0.05$ , # $p < 0.05$ , \*\* $p < 0.01$ , ## $p < 0.01$ , \*\*\* $p < 0.001$ , and ### $p < 0.001$ .

### SUPPLEMENTAL INFORMATION

Supplemental Information includes Supplemental Experimental Procedures, four figures, and six tables and can be found with

this article online at <http://dx.doi.org/10.1016/j.stemcr.2017.06.017>.

## AUTHOR CONTRIBUTIONS

J.X. and Y.W. designed the experiments, acquired the data, and performed the analysis. G.L. contributed to plasmid construction. L.M., G.Y., and K.F. provided materials and contributed to technical assistance. X.G., W.J., G.W., and P.L. discussed the project conception and design. J.X., Y.W., and J.K. wrote the manuscript.

## ACKNOWLEDGMENTS

This work was supported by grants obtained from the National Natural Science Foundation of China (grant numbers 31401257, 81530042, 91519320, 31210103905, 31471250, 31371510, 31571519, 31571529, 31571390, 31401126), the Ministry of Science and Technology (grant numbers 2016YFA0101300, 2013CB967600, 2013CB967401), the Ministry of Education (grant IRT\_15R51), and the Science and Technology Commission of Shanghai Municipality (grant numbers 15JC1403200, 15JC1403201).

Received: January 22, 2017

Revised: June 27, 2017

Accepted: June 28, 2017

Published: July 27, 2017

## REFERENCES

- Agalioti, T., Chen, G., and Thanos, D. (2002). Deciphering the transcriptional histone acetylation code for a human gene. *Cell* **111**, 381–392.
- Bailey, T.L., Boden, M., Buske, F.A., Frith, M., Grant, C.E., Clementi, L., Ren, J., Li, W.W., and Noble, W.S. (2009). MEME SUITE: tools for motif discovery and searching. *Nucleic Acids Res.* **37**, W202–W208.
- Bajpai, R., Chen, D.A., Rada-Iglesias, A., Zhang, J., Xiong, Y., Helms, J., Chang, C.P., Zhao, Y., Swigut, T., and Wysocka, J. (2010). CHD7 cooperates with PBAF to control multipotent neural crest formation. *Nature* **463**, 958–962.

## Figure 6. MiR-29b Regulates NTE versus NCC Fate Decision in Human ESC Neural Differentiation

- (A) Immunofluorescence assays of PAX6 and SOX1 in hESC-derived NTE cells.
- (B) Immunofluorescence assays of P75 and SOX10 in hESC-derived NCCs.
- (C) Compared with initiation differentiation cells (D1), miR-29b was upregulated in NTE cells and downregulated in NCCs as verified by qPCR.
- (D and E) Inhibiting miR-29b reduced the NTE differentiation efficiency of hESCs as shown by qPCR (D) and immunofluorescence of NTE differentiation as well as the quantification of PAX6- and SOX1-positive cells (E) on D12.
- (F–H) Inhibiting miR-29b improved the NCC differentiation efficiency of hESCs as shown by qPCR (F) and immunofluorescence (G and H) of NCC differentiation cells, and quantification of SOX10- and P75-positive cells, on D12. The dashed lines indicate the region of the sphere.
- (I and J) Overexpressing miR-29b improved the NTE differentiation efficiency of hESCs as shown by qPCR (I) and immunofluorescence (J) of NTE differentiation cells, and quantification of PAX6- and SOX1-positive cells, on D12.
- (K–M) Overexpressing miR-29b reduced the NCC differentiation efficiency of hESCs as shown by qPCR (K), and immunofluorescence (L and M) of NCC differentiation cells, and quantification of SOX10- and P75-positive cells, on D12. The dashed lines indicate the region of the sphere.

Means  $\pm$  SEM from  $n = 3$  independent experiments. \* $p < 0.05$ , \*\* $p < 0.01$ , \*\*\* $p < 0.001$  versus the control. Scale bars, 100  $\mu$ m.

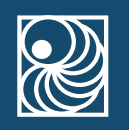

- Bhatt, S., Diaz, R., and Trainor, P.A. (2013). Signals and switches in Mammalian neural crest cell differentiation. *Cold Spring Harb. Perspect. Biol.* 5.
- Bronner-Fraser, M., and Fraser, S.E. (1988). Cell lineage analysis reveals multipotency of some avian neural crest cells. *Nature* 335, 161–164.
- Chen, J.A., Huang, Y.P., Mazzoni, E.O., Tan, G.C., Zavadil, J., and Wichterle, H. (2011). Mir-17-3p controls spinal neural progenitor patterning by regulating Olig2/Irx3 cross-repressive loop. *Neuron* 69, 721–735.
- Cheng, J., Wang, Y., Wang, D., and Wu, Y. (2013). Identification of collagen 1 as a post-transcriptional target of miR-29b in skin fibroblasts: therapeutic implication for scar reduction. *Am. J. Med. Sci.* 346, 98–103.
- Cicchini, C., de Nonno, V., Battistelli, C., Cozzolino, A.M., De Santis Puzzonza, M., Ciafre, S.A., Brocker, C., Gonzalez, F.J., Amicone, L., and Tripodi, M. (2015). Epigenetic control of EMT/MET dynamics: HNF4alpha impacts DNMT3s through miRs-29. *Biochim. Biophys. Acta* 1849, 919–929.
- Conaco, C., Otto, S., Han, J.J., and Mandel, G. (2006). Reciprocal actions of REST and a microRNA promote neuronal identity. *Proc. Natl. Acad. Sci. USA* 103, 2422–2427.
- Du, Z.W., Ma, L.X., Phillips, C., and Zhang, S.C. (2013). miR-200 and miR-96 families repress neural induction from human embryonic stem cells. *Development* 140, 2611–2618.
- Ebert, M.S., Neilson, J.R., and Sharp, P.A. (2007). MicroRNA sponges: competitive inhibitors of small RNAs in mammalian cells. *Nat. Methods* 4, 721–726.
- Evans, M.J., and Kaufman, M.H. (1981). Establishment in culture of pluripotential cells from mouse embryos. *Nature* 292, 154–156.
- Fineberg, S.K., Kosik, K.S., and Davidson, B.L. (2009). MicroRNAs potentiate neural development. *Neuron* 64, 303–309.
- Gessert, S., Bugner, V., Tecza, A., Pinker, M., and Kuhl, M. (2010). FMR1/FXR1 and the miRNA pathway are required for eye and neural crest development. *Dev. Biol.* 341, 222–235.
- Guenther, M.G., Levine, S.S., Boyer, L.A., Jaenisch, R., and Young, R.A. (2007). A chromatin landmark and transcription initiation at most promoters in human cells. *Cell* 130, 77–88.
- Guo, X., Liu, Q., Wang, G., Zhu, S., Gao, L., Hong, W., Chen, Y., Wu, M., Liu, H., Jiang, C., et al. (2013). microRNA-29b is a novel mediator of Sox2 function in the regulation of somatic cell reprogramming. *Cell Res.* 23, 142–156.
- Hobert, O. (2008). Gene regulation by transcription factors and microRNAs. *Science* 319, 1785–1786.
- Hu, N., Strobl-Mazzulla, P., Sauka-Spengler, T., and Bronner, M.E. (2012). DNA methyltransferase3A as a molecular switch mediating the neural tube-to-neural crest fate transition. *Genes Dev.* 26, 2380–2385.
- Hume, M.A., Barrera, L.A., Gisselbrecht, S.S., and Bulyk, M.L. (2015). UniPROBE, update 2015: new tools and content for the online database of protein-binding microarray data on protein-DNA interactions. *Nucleic Acids Res.* 43, D117–D122.
- Jacques-Fricke, B.T., Roffers-Agarwal, J., and Gammill, L.S. (2012). DNA methyltransferase 3b is dispensable for mouse neural crest development. *PLoS One* 7, e47794.
- Kapinas, K., Kessler, C., Ricks, T., Gronowicz, G., and Delany, A.M. (2010). miR-29 modulates Wnt signaling in human osteoblasts through a positive feedback loop. *J. Biol. Chem.* 285, 25221–25231.
- Kim, H., Lee, G., Ganat, Y., Papapetrou, E.P., Lipchina, I., Socci, N.D., Sadelain, M., and Studer, L. (2011). miR-371-3 expression predicts neural differentiation propensity in human pluripotent stem cells. *Cell Stem Cell* 8, 695–706.
- Lee, G., Kim, H., Elkabetz, Y., Al Shamy, G., Panagiotakos, G., Barberi, T., Tabar, V., and Studer, L. (2007). Isolation and directed differentiation of neural crest stem cells derived from human embryonic stem cells. *Nat. Biotechnol.* 25, 1468–1475.
- Leone, V., D'Angelo, D., Pallante, P., Croce, C.M., and Fusco, A. (2012). Thyrotropin regulates thyroid cell proliferation by up-regulating miR-23b and miR-29b that target SMAD3. *J. Clin. Endocrinol. Metab.* 97, 3292–3301.
- Liu, Q., Spusta, S.C., Mi, R., Lassiter, R.N., Stark, M.R., Hoke, A., Rao, M.S., and Zeng, X. (2012). Human neural crest stem cells derived from human ESCs and induced pluripotent stem cells: induction, maintenance, and differentiation into functional schwann cells. *Stem Cells Transl. Med.* 1, 266–278.
- Martins-Taylor, K., Schroeder, D.I., LaSalle, J.M., Lalande, M., and Xu, R.H. (2012). Role of DNMT3B in the regulation of early neural and neural crest specifiers. *Epigenetics* 7, 71–82.
- Mayor, R., and Theveneau, E. (2013). The neural crest. *Development* 140, 2247–2251.
- Meulemans, D., and Bronner-Fraser, M. (2004). Gene-regulatory interactions in neural crest evolution and development. *Dev. Cell* 7, 291–299.
- Meunier, L., Siddeek, B., Vega, A., Lakhdari, N., Inoubli, L., Bellon, R.P., Lemaire, G., Mauduit, C., and Benahmed, M. (2012). Perinatal programming of adult rat germ cell death after exposure to xenoestrogens: role of microRNA miR-29 family in the down-regulation of DNA methyltransferases and Mcl-1. *Endocrinology* 153, 1936–1947.
- Minamino, Y., Ohnishi, Y., Kakudo, K., and Nozaki, M. (2015). Isolation and propagation of neural crest stem cells from mouse embryonic stem cells via cranial neurospheres. *Stem Cells Dev.* 24, 172–181.
- Rosa, A., and Brivanlou, A.H. (2010). A regulatory circuitry comprised of miR-302 and the transcription factors OCT4 and NR2F2 regulates human embryonic stem cell differentiation. *EMBO J.* 30, 237–248.
- Sauka-Spengler, T., and Bronner-Fraser, M. (2008). A gene regulatory network orchestrates neural crest formation. *Nat. Rev. Mol. Cell Biol.* 9, 557–568.
- Seila, A.C., Calabrese, J.M., Levine, S.S., Yeo, G.W., Rahl, P.B., Flynn, R.A., Young, R.A., and Sharp, P.A. (2008). Divergent transcription from active promoters. *Science* 322, 1849–1851.
- Sheehy, N.T., Cordes, K.R., White, M.P., Ivey, K.N., and Srivastava, D. (2010). The neural crest-enriched microRNA miR-452 regulates



- epithelial-mesenchymal signaling in the first pharyngeal arch. *Development* *137*, 4307–4316.
- Shi, Y., Zhao, X., Hsieh, J., Wichterle, H., Impey, S., Banerjee, S., Neveu, P., and Kosik, K.S. (2010). MicroRNA regulation of neural stem cells and neurogenesis. *J. Neurosci.* *30*, 14931–14936.
- Shin, J., Shin, Y., Oh, S.M., Yang, H., Yu, W.J., Lee, J.P., Huh, S.O., Lee, S.H., Suh, Y.H., Chung, S., et al. (2014). MiR-29b controls fetal mouse neurogenesis by regulating ICAT-mediated Wnt/beta-catenin signaling. *Cell Death Dis.* *5*, e1473.
- Subramanian, M., Rao, S.R., Thacker, P., Chatterjee, S., and Karunagan, D. (2014). MiR-29b downregulates canonical Wnt signaling by suppressing coactivators of beta-catenin in human colorectal cancer cells. *J. Cell. Biochem.* *115*, 1974–1984.
- Thomson, J.A., Itskovitz-Eldor, J., Shapiro, S.S., Waknitz, M.A., Swiergiel, J.J., Marshall, V.S., and Jones, J.M. (1998). Embryonic stem cell lines derived from human blastocysts. *Science* *282*, 1145–1147.
- Tu, J., Ng, S.H., Luk, A.C., Liao, J., Jiang, X., Feng, B., Lun Mak, K.K., Rennert, O.M., Chan, W.Y., and Lee, T.L. (2015). MicroRNA-29b/Tet1 regulatory axis epigenetically modulates mesendoderm differentiation in mouse embryonic stem cells. *Nucleic Acids Res.* *43*, 7805–7822.
- Veeman, M.T., Slusarski, D.C., Kaykas, A., Louie, S.H., and Moon, R.T. (2003). Zebrafish *prickle*, a modulator of noncanonical Wnt/Fz signaling, regulates gastrulation movements. *Curr. Biol.* *13*, 680–685.
- Vitiello, M., Valentino, T., De Menna, M., Crescenzi, E., Francesca, P., Rea, D., Arra, C., Fusco, A., De Vita, G., Cerchia, L., et al. (2016). PATZ1 is a target of miR-29b that is induced by Ha-Ras oncogene in rat thyroid cells. *Sci. Rep.* *6*, 25268.
- Wang, Z., Zang, C., Rosenfeld, J.A., Schones, D.E., Barski, A., Cudapah, S., Cui, K., Roh, T.Y., Peng, W., Zhang, M.Q., et al. (2008). Combinatorial patterns of histone acetylations and methylations in the human genome. *Nat. Genet.* *40*, 897–903.
- Wang, Z.B., Boisvert, E., Zhang, X., Guo, M., Fashoyin, A., Du, Z.W., Zhang, S.C., and Li, X.J. (2011). *Fezf2* regulates telencephalic precursor differentiation from mouse embryonic stem cells. *Cereb. Cortex* *21*, 2177–2186.
- Watanabe, K., Kamiya, D., Nishiyama, A., Katayama, T., Nozaki, S., Kawasaki, H., Watanabe, Y., Mizuseki, K., and Sasai, Y. (2005). Directed differentiation of telencephalic precursors from embryonic stem cells. *Nat. Neurosci.* *8*, 288–296.
- Xu, L., Xu, Y., Jing, Z., Wang, X., Zha, X., Zeng, C., Chen, S., Yang, L., Luo, G., Li, B., et al. (2014). Altered expression pattern of miR-29a, miR-29b and the target genes in myeloid leukemia. *Exp. Hematol. Oncol.* *3*, 17.
- Zhang, S.C. (2006). Neural subtype specification from embryonic stem cells. *Brain Pathol.* *16*, 132–142.
- Zhang, S.C., Wernig, M., Duncan, I.D., Brustle, O., and Thomson, J.A. (2001). *In vitro* differentiation of transplantable neural precursors from human embryonic stem cells. *Nat. Biotechnol.* *19*, 1129–1133.
- Zhao, C., Sun, G., Li, S., and Shi, Y. (2009). A feedback regulatory loop involving microRNA-9 and nuclear receptor TLX in neural stem cell fate determination. *Nat. Struct. Mol. Biol.* *16*, 365–371.
- Zhu, Q., Song, L., Peng, G., Sun, N., Chen, J., Zhang, T., Sheng, N., Tang, W., Qian, C., Qiao, Y., et al. (2014). The transcription factor *Pou3f1* promotes neural fate commitment via activation of neural lineage genes and inhibition of external signaling pathways. *Elife* *3*. <http://dx.doi.org/10.7554/eLife.02224>.



**Stem Cell Reports, Volume 9**

**Supplemental Information**

**Mir-29b Mediates the Neural Tube versus Neural Crest Fate Decision  
during Embryonic Stem Cell Neural Differentiation**

**Jiajie Xi, Yukang Wu, Guoping Li, Li Ma, Ke Feng, Xudong Guo, Wenwen Jia, Guiying Wang, Guang Yang, Ping Li, and Jiahong Kang**

Figure S1

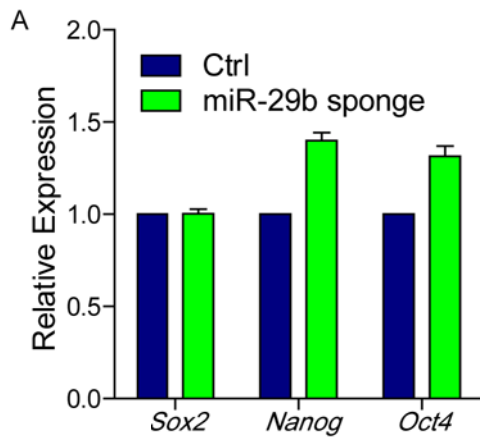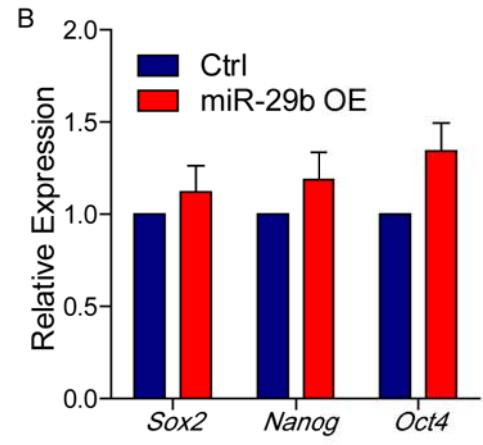

Figure S2

A

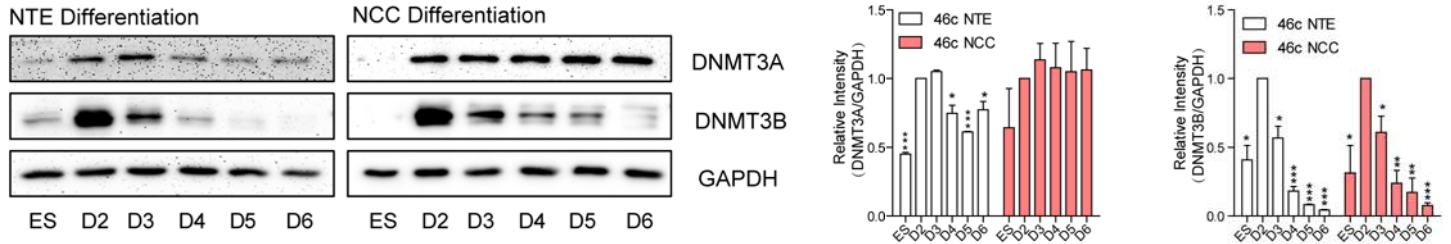

B

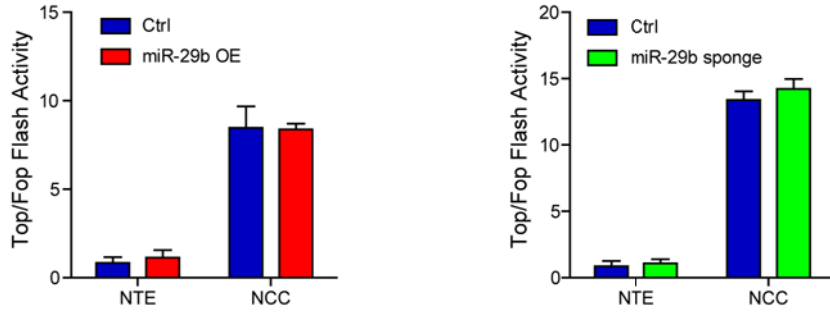

C

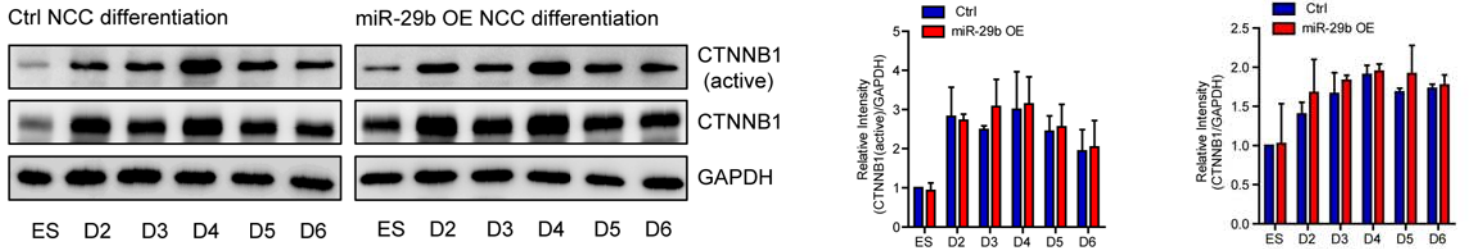

D

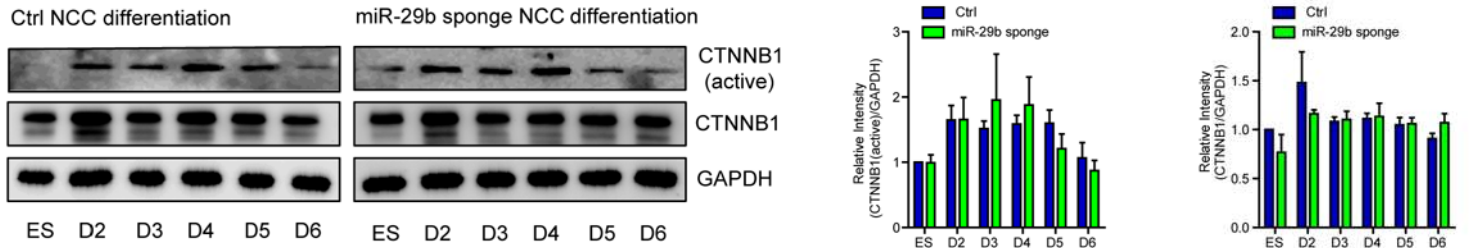

E

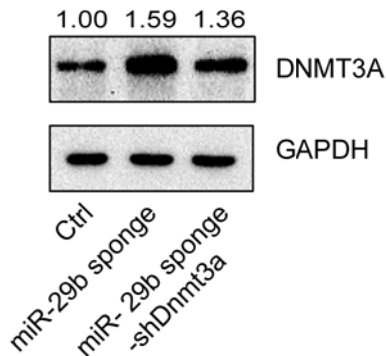

F

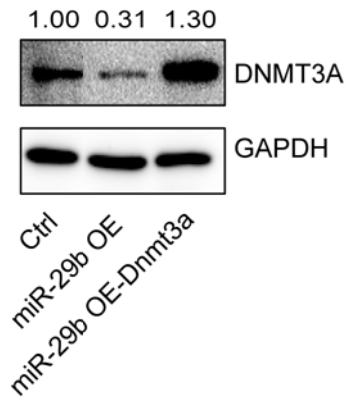

Figure S3

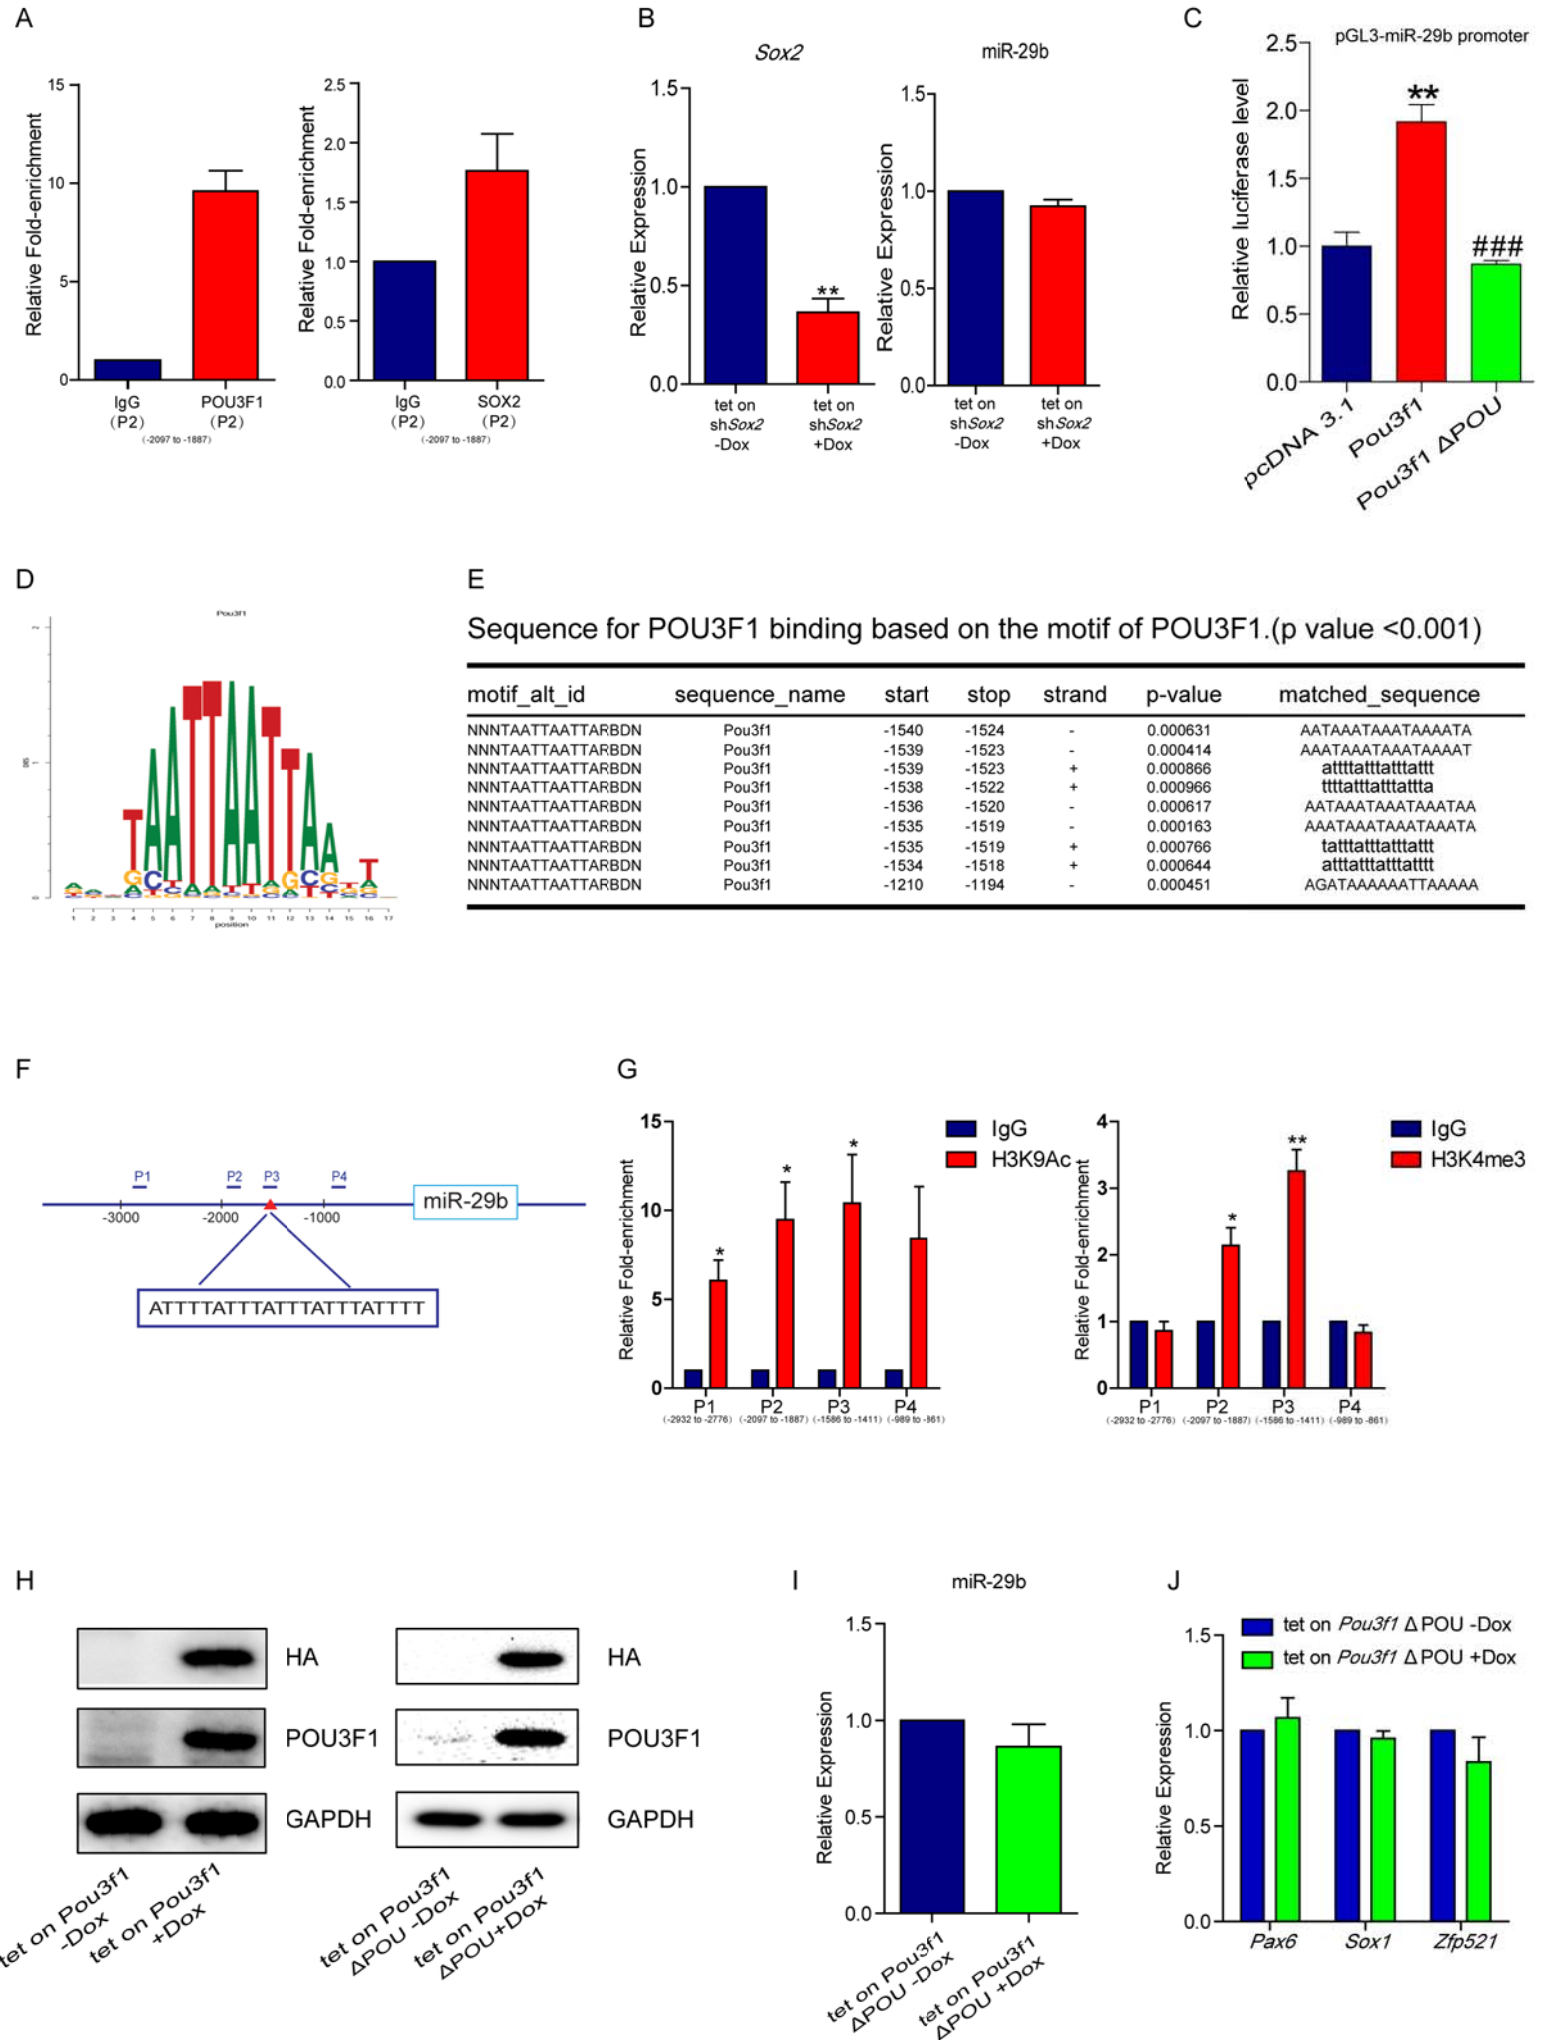

Figure S4

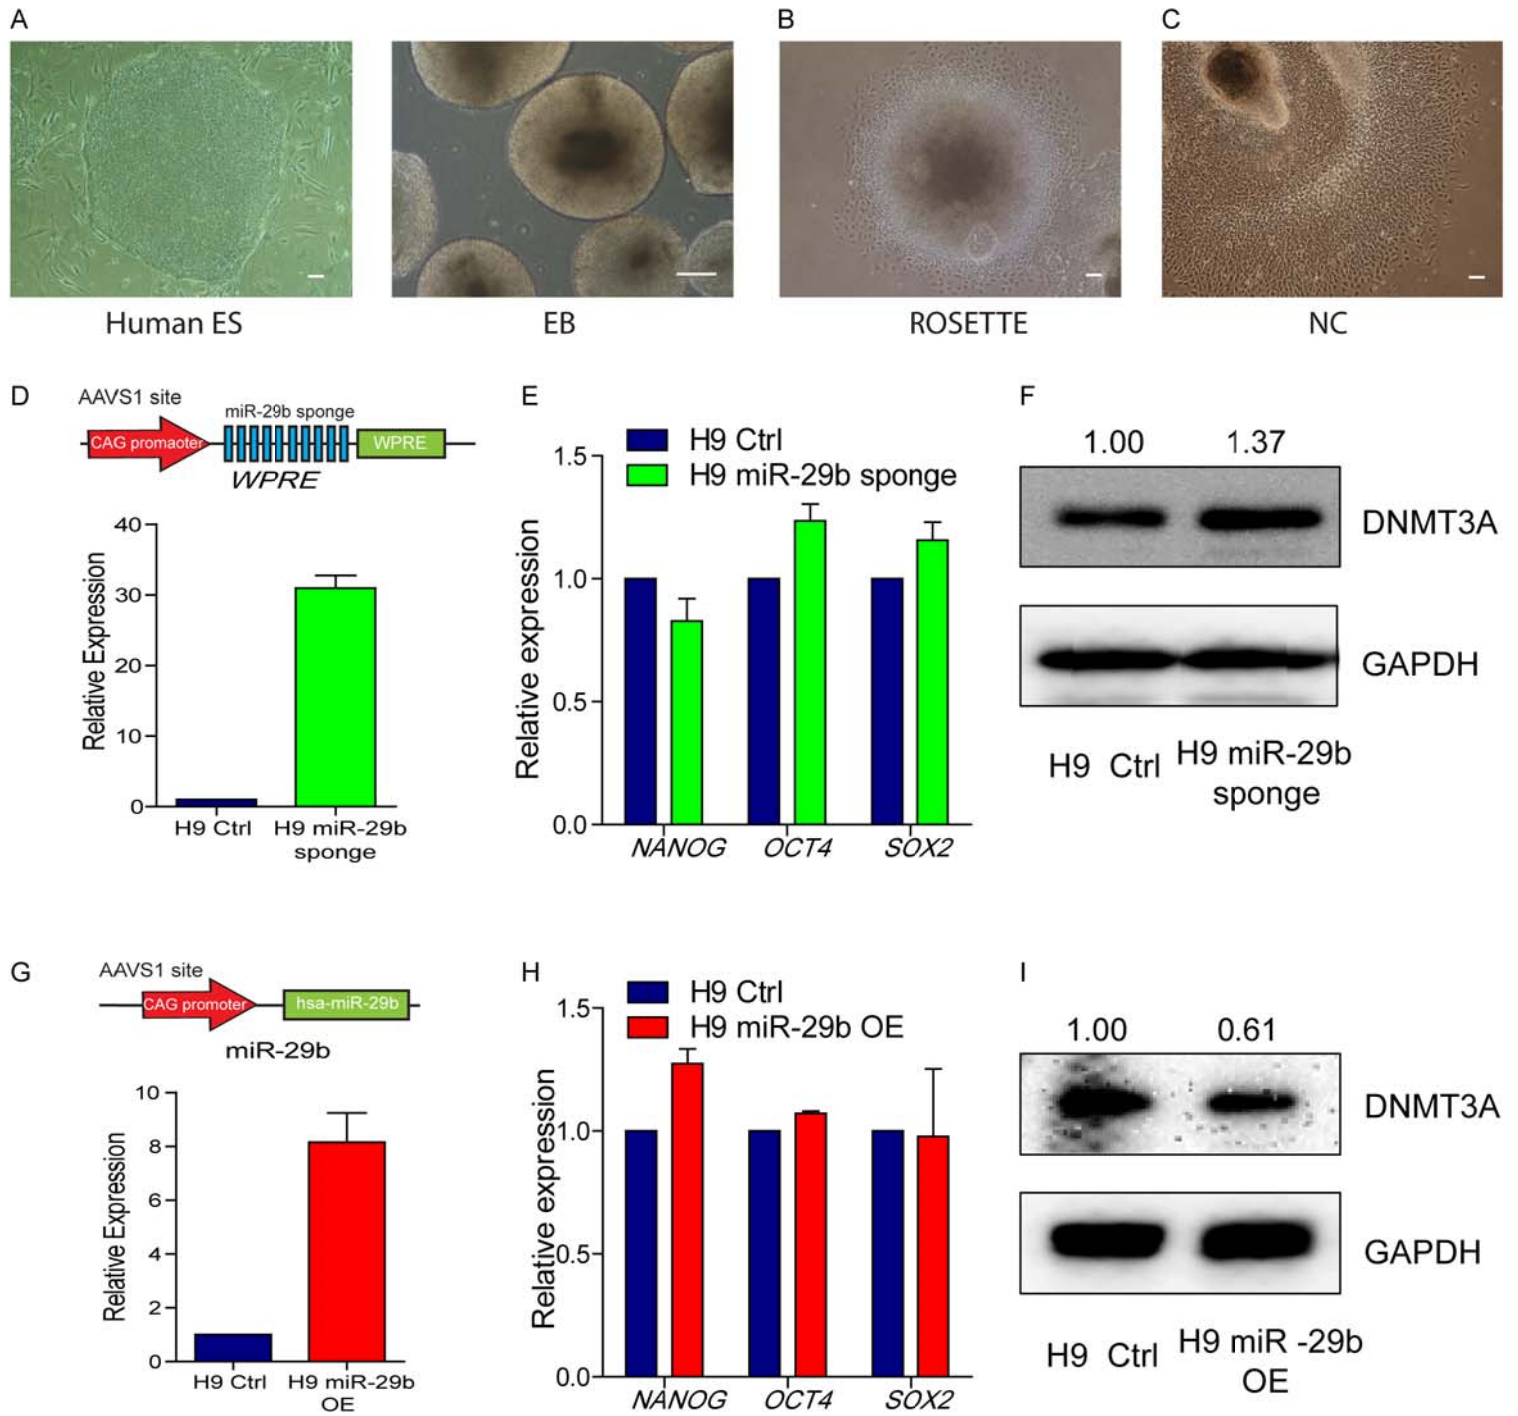

Figure S1.

Q-PCR assay showed neither inhibition (A) or overexpression (B) of miR-29b substantially influences the expression of pluripotent genes in mouse ES cells.

Data are shown as means  $\pm$  SEM of at least three independent experiments.

Figure S2.

(A) Western blotting showed the expression profiles of DNMT3A and DNMT3B during NTE and NCC differentiation respectively. GAPDH is the normalization control. The protein abundance of DNMT3A and DNMT3B was quantified with normalization by signals of GAPDH.

(B) TOP/FOP flash assay for D4 cells in ctrl, miR-29b OE cell line or ctrl, miR-29b sponge cell line during NTE and NCC differentiation respectively.

(C and D) Western blotting analyzed the protein levels of total and active CTNNB1 in ctrl, miR-29b OE cell line during NCC differentiation (C) or ctrl, miR-29b sponge cell line during NCC differentiation (D). GAPDH is the normalization control. The protein abundance of total and active CTNNB1 was quantified with normalization by signals of GAPDH.

(E) DNMT3A knock down efficiency in miR-29b sponge cell line, as verified by western blotting. GAPDH is the normalization control. The protein abundance of DNMT3A was quantified with normalization by signals of GAPDH.

(F) DNMT3A overexpression efficiency in miR-29b OE cell line, as verified by western blotting. GAPDH is the normalization control. The protein abundance of DNMT3A was quantified with normalization by signals of GAPDH.

Data are shown as means  $\pm$  SEM of at least three independent experiments. Unpaired two-tailed Student's t test was used. \* $p < 0.05$ , \*\* $p < 0.01$  versus the control or D2 protein level (A).

Figure S3.

(A) ChIP assay showed the enrichment of POU3f1, but not SOX2 at the upstream region of miR-29b.

- (B) Q-PCR measured the expression levels of *Sox2* and miR-29b in tet on sh*Sox2* cell line with and without Dox.
- (C) Luciferase reporter assay in 3T3 cells transfected control (pcDNA3.1), *Pou3fl* and *Pou3fl* $\Delta$ *POU* respectively with pGL3-miR-29b promoter.
- (D) Binding motif of POU3F1 based on the UniPROBE database.
- (E) Analysis of matched sequence and position in the 3kb region upstream of miR-29b based on the motif of POU3F1.
- (F) Schematics showing the position of primers (P1, P2, P3 and P4) for CHIP assay and predicated POU3F1 binding site in the 3kb region upstream of miR-29b (red delta).
- (G) CHIP assays showed the enrichment of H3K9Ac and H3K4me3 in the upstream region of miR-29b.
- (H) Overexpression efficiency of HA-POU3F1 (left) and HA-POU3F1 $\Delta$ POU (right) with the inducible system, as verified by western blotting.
- (I) Overexpressing of *Pou3fl* $\Delta$ *POU* didn't affect the expression level of miR-29b on D3 of NTE differentiation.
- (J) Overexpression of *Pou3fl* $\Delta$ *POU* didn't promote NTE differentiation as shown by Q-PCR on D5 of NTE differentiation.

Data are shown as means  $\pm$  SEM of at least three independent experiments. Unpaired two-tailed Student's t test was used. \* $p < 0.05$ , \*\* $p < 0.01$  versus the control, ### $p < 0.001$  versus the *Pou3fl* group (C).

#### Figure S4.

- (A) hESCs growing on MEF feeders and formed embryoid bodies (EBs) in suspension culture.
- (B) Columnar epithelial cells at D10 organized into rosettes like structure in NTE differentiation.
- (C) Stellate-morphology cells migrated out of the spheres after the EBs were attached to the Matrigel-coated dish.
- (D) Diagram of insert a CAG promoter driving ten-copy miR-29b sponge into AAVS1

site and the expression level of miR-29b sponge verified by Q-PCR.

(E) Q-PCR assay showed inhibition of miR-29b did not influence the expression of pluripotent marker genes in human ES cells.

(F) Western blotting analyzed the expression level of DNMT3A in human ES after inhibiting miR-29b. The protein abundance of DNMT3A was quantified with normalization by signals of GAPDH.

(G) Diagram of insert a CAG promoter driving miR-29b cassette into AAVS1 site and miR-29b overexpression efficiency, as verified by the expression level of miR-29b through Q-PCR.

(H) Q-PCR assay showed overexpression of miR-29b did not influence the expression of pluripotent marker genes in human ES cells.

(I) Western blotting analyzed the expression level of DNMT3A in human ES after overexpressing miR-29b. The protein abundance of DNMT3A was quantified with normalization by signals of GAPDH.

Data are shown as means  $\pm$  SEM of at least three independent experiments. Unpaired two-tailed Student's t test was used. Scale bars, 100  $\mu$ m.



## Supplemental Tables

**Table S1. Primers used for vectors construction**

|                                        |                                                                                |   |
|----------------------------------------|--------------------------------------------------------------------------------|---|
| miR-29b<br>sponge (3<br>repeats)       | AACACTGATTGTTATGGTGCTACCGAACACTGATTGTTATGGTGCTAGCGAA<br>CACTGATTGTTATGGTGCTA   | F |
|                                        | TAGCACCATAACAATCAGTGTTTCGCTAGCACCATAACAATCAGTGTTTCGGTA<br>GCACCATAACAATCAGTGTT | R |
| <i>Dnmt3a</i>                          | CGGGATCCATGCCCTCCAGCGGCCCGGGGA                                                 | F |
|                                        | GCTCTAGATTACACACAAGCAAAATATTCCTTCAG                                            | R |
| <i>Dnmt3a</i> -<br>shRNA               | CCGGGTGCAGAAACATCGAGGACATCTCGAGATGTCCTCGATGTTTCTGCAC<br>TTTTTG                 | F |
|                                        | AATTCAAAAAGTGCAGAAACATCGAGGACATCTCGAGATGTCCTCGATGTTT<br>CTGCAC                 | R |
| <i>Luciferase</i> -<br>shRNA           | CCGGTGAAACGATATGGGCTGAATACTCGAGTATTCAGCCCATATCGTTTCAT<br>TTTT                  | F |
|                                        | AATTA AAAATGAAACGATATGGGCTGAATACTCGAGTATTCAGCCCATATCGT<br>TTCA                 | R |
| <i>HA-Pou3f1</i>                       | CGGGATCCATGTACCATACGATGTTCCAGATTACGCTGCCACCACCGCGCA<br>GTATC                   | F |
|                                        | GGAATTCTCACTGCACAGAGCCGGGCAGTG                                                 | R |
| Mmu-miR-29<br>b Pri                    | CGCGGATCCCCTGAAATTAGGAACTATTGCACGGAC                                           | F |
|                                        | CGCGTCGACTAGCCTGTTTTAGACACTGGACACTTA                                           | R |
| Hsa-miR-29b<br>Pri                     | CGGGATCCCAGGCATGCTCTCCCATCAATAAC                                               | F |
|                                        | GCTCTAGA ACTGCCATTTGTGATATATGCCACC                                             | R |
| <i>Pou3f1</i> -<br>shRNA               | CCGGGCAGCGGAAGATCCAGAATCTCGAGATTCTGGATCTTCCGCTGCTTTT<br>TG                     | F |
|                                        | AATTCAAAAAGCAGCGGAAGATCCAGAATCTCGAGATTCTGGATCTTCCGCT<br>GC                     | R |
| <i>Sox2</i> -shRNA                     | CCGGGCCCTGCAGTACA ACTCCATGCTCGAGCATGGAGTTG TACTGCAGGG<br>CTTTTTG               | F |
|                                        | AATTCAAAAAGCCCTGCAGTACA ACTCCATGCTCGAGCATGGAGTTG TACTG<br>CAGGGC               | R |
| <i>WPRE</i>                            | GGAATTCAATCAACCTCTGGATTACAAAATTTGTG                                            | F |
|                                        | CCGCAATTGCAGGCGGGGAGGCGGCCCAAAGGGA                                             | R |
| Mmu-miR-29<br>b promoter               | GGGGTACCTCCC GCGTGGAGGCCCTTGAATGGA                                             | F |
|                                        | CGACGCGTGAAGAAGCTTTGTCTGCTGTTTTTG                                              | R |
| Mmu-miR-29<br>b promoter<br>Fragment-A | GGGGTACCTCCC GCGTGGAGGCCCTTGAATGGA                                             | F |
|                                        | CGACGCGTGCGGACTCTGGGGCCTTCCATGGCC                                              | R |
| Mmu-miR-29<br>b promoter<br>Fragment-B | GGGGTACCACTTGTATGCATGTCCTGAGGGAAG                                              | F |
|                                        | CGACGCGTGATAATCAAACAAATTCCTGTATTTGTGC                                          | R |
| Mmu-miR-29                             | GGGGTACCATTGAAAGTTAATGCCATGTAGTGAG                                             | F |

|            |                                   |   |
|------------|-----------------------------------|---|
| b promoter |                                   |   |
| Fragment-C | CGACGCGTGAAGAAGCTTTGTCGTCTGTTTTTG | R |

**Table S2. Primer sets used in Q-PCR assays**

|                               |                           |   |
|-------------------------------|---------------------------|---|
| Human & Mouse<br><i>Sox1</i>  | GTTTTTTGTAGTTGTTACCGC     | F |
|                               | GCATTTACAAGAAATAATAC      | R |
| Human & mouse<br><i>GAPDH</i> | ATGACATCAAGAAGGTGGTG      | F |
|                               | CATACCAGGAAATGAGCTTG      | R |
| Human & Mouse<br><i>Nanog</i> | ATTCTTCCACCAGTCCCAA       | F |
|                               | ATCTGCTGGAGGCTGAGGTA      | R |
| Human & Mouse<br><i>Pax6</i>  | TCTTTGCTTGGGAAATCCG       | F |
|                               | CTGCCCGTTCAACATCCTTAG     | R |
| Human <i>OCT4</i>             | ACATCAAAGCTCTGCAGAAAGAACT | F |
|                               | CTGAATACCTTCCCAAATAGAACCC | R |
| Human <i>P75</i>              | GCAGAACAAGCAAGGAGCCA      | F |
|                               | CCGCAGAGCCGTTGAGAAG       | R |
| Human <i>SNAIL2</i>           | TGTGACAAGGAATATGTGAGCC    | F |
|                               | TGAGCCCTCAGATTTGACCTG     | R |
| Human <i>SOX10</i>            | CCTCACAGATCGCCTACACC      | F |
|                               | CATATAGGAGAAGGCCGAGTAGA   | R |
| Human <i>SOX2</i>             | GCCCTGCAGTACAACCTCCAT     | F |
|                               | TGGAGTGGGAGGAAGAGGTA      | R |
| Human <i>ZNF521</i>           | TTCCGAGCAAGTGCAGAAAG      | F |
|                               | AAGGTTCGAGAGCACACGTTG     | R |
| Mouse <i>Fgf5</i>             | AAAGTCAATGGCTCCCACGAA     | F |
|                               | GGCACTTGCATGGAGTTTTCC     | R |
| Mouse <i>Nestin</i>           | CTGCAGGCCACTGAAAAGTT      | F |
|                               | GACCCTGCTTCTCCTGCTC       | R |
| Mouse <i>Oct4</i>             | ACATGAAAGCCCTGCAGAAGGAGCT | F |
|                               | GAGAACGCCCCAGGGTGAGCC     | R |
| Mouse <i>P75</i>              | ACCCGAGGCACCGCTGACAACCTCA | F |
|                               | GGTACTGTAGAGGTTGCCATCACC  | R |
| Mouse <i>Pou3f1</i>           | AGTTCGCCAAGCAGTTCAAG      | F |
|                               | TGGTCTGCGAGAACACGTTA      | R |
| Mouse <i>Rex1</i>             | GGAAGAAATGCTGAAGGTGGAGAC  | F |
|                               | AGTCCCCATCCCCTTCAATAGC    | R |
| Mouse <i>Snail2</i>           | TGGTCAAGAAACATTTCAACGCC   | F |
|                               | GGTGAGGATCTCTGGTTTTGGTA   | R |
| Mouse <i>Sox10</i>            | AAAGGACCATCCGGACTACAAGTA  | F |
|                               | CTGCAGCTCTGTCTTTGGGGTG    | R |
| Mouse <i>Sox2</i>             | CAGGAGAACCCCAAGATGCACAA   | F |

|                     |                       |   |
|---------------------|-----------------------|---|
|                     | ATTAAGCTCCTGGGTCGCAAG | R |
| Mouse <i>Tubb3</i>  | TAGACCCCAGCGGCAACTAT  | F |
|                     | GTTCCAGGTTCCAAGTCCACC | R |
| Mouse <i>Zfp521</i> | GAGCGAAGAGGAGTTTTTGG  | F |
|                     | AGTTCCAAGGTGGAGGTCAC  | R |

**Table S3. Primers for ChIP assay**

|                     |                              |   |
|---------------------|------------------------------|---|
| P1 (-2932 to -2776) | GAGATGGGAGGCACAAGGCAAAG      | F |
|                     | GGTTAAATCAGGTAGTACATGAGATGAT | R |
| P2 (-2097 to -1887) | AGGGAGAAGGGAAGCACGGGCACA     | F |
|                     | AGGAACAGGCTCACCATGAGAATAG    | R |
| P3 (-1586 to -1411) | TGAACATTTTCTTTTCGGTTTGGTG    | F |
|                     | CAGGCTACAGACTGGGAATCTATTTTC  | R |
| P4 (-989 to -861)   | ATGCCATGTAGTGAGCCCTGAAATT    | F |
|                     | CCTTTATCCCTTCCTGCTCATTCTC    | R |

**Table S4. Antibodies for immunostaining analysis and FACS**

| Antibodies                 | Manufacture       | Catalog    |
|----------------------------|-------------------|------------|
| Anti-P75                   | abcam             | ab38335    |
| Anti-PAX6                  | DSHB              | PAX6       |
| Anti-GFP                   | Proteintech       | 50430-2-AP |
| Anti-SOX1                  | R&D               | AF3369     |
| Anti-SOX2                  | R&D               | MAB2018R   |
| Anti-FOXD3                 | Santa Cruz        | sc-133588  |
| Anti-P75                   | Santa Cruz        | sc-6188    |
| Anti-SOX10                 | Santa Cruz        | sc-17342   |
| Donkey anti-Rabbit IgG 594 | Life technologies | A21207     |
| Donkey anti-Rabbit IgG 488 | Life technologies | A21206     |
| Donkey anti-Mouse IgG 594  | Life technologies | A21203     |
| Donkey anti-Mouse IgG 488  | Life technologies | A21202     |
| Donkey                     | Life technologies | A11058     |

|                                |                   |        |
|--------------------------------|-------------------|--------|
| anti-Goat IgG<br>594           |                   |        |
| Donkey<br>anti-Goat IgG<br>488 | Life technologies | A11055 |
| Donkey<br>anti-Goat IgG<br>647 | Life technologies | A21447 |
| Ho.33342                       | Sigma             | 14533  |

**Table S5. Antibodies for Western blotting analysis**

| <b>Antibodies</b>      | <b>Manufacture</b>           | <b>Catalog</b> |
|------------------------|------------------------------|----------------|
| Anti-HA                | Abcam                        | ab9110         |
| Anti-POU3F1            | Abcam                        | ab31766        |
| Anti-CTNNB1            | Abcam                        | Ab22656        |
| Anti-active<br>CTNNB1  | Millipore                    | 07-473         |
| Anti-GAPDH             | Bioworld                     | AP0063         |
| Anti-DNMT3A            | Cell Signaling<br>Technology | 3598           |
| Anti-DNMT3B            | Cell Signaling<br>Technology | 2161           |
| Anti-Rabbit<br>IgG HRP | Cell Signaling<br>Technology | 7074S          |
| Anti-mouse<br>IgG HRP  | Cell Signaling<br>Technology | 7076S          |

**Table S6. Antibodies for ChIP analysis**

| <b>Antibodies</b> | <b>Manufacture</b>           | <b>Catalog</b> |
|-------------------|------------------------------|----------------|
| Anti-SOX2         | Abcam                        | ab59776        |
| Anti-POU3F1       | Santa Cruz<br>Biotechnology  | Sc-28593       |
| Anti-H3K4me3      | Millipore                    | 07-473         |
| Anti-H3K9Ac       | Millipore                    | 06-942         |
| Rabbit IgG        | Cell Signaling<br>Technology | 2729s          |

## **Supplemental Experimental procedures**

### **Mouse ES cell (mESC) culture and differentiation**

The mESC Sox1-GFP (46c, passages 12-25) was cultured on a feeder layer in Dulbecco's Modified Eagle's Medium (DMEM, GIBCO) supplemented with 15% fetal bovine serum (FBS, GIBCO), 2 mM L-glutamax (Invitrogen), 2 mM nonessential amino acids (NEAA, Invitrogen), 1 mM sodium pyruvate (Invitrogen), 0.1 mM  $\beta$ -mercaptoethanol (Sigma), and 20 ng/ml homemade LIF. For differentiation, mESCs were dissociated and suspended on 10-cm Petri dishes at a density of 50000 cells/mL with 10 mL in growth minimal essential medium (GMEM) (Gibco) supplemented with 8% knockout serum replacement (KOSR; Gibco), 2 mM L-glutamax, 2 mM NEAA, 1 mM sodium pyruvate and 0.1 mM  $\beta$ -mercaptoethanol. After 2 days of incubation, the cells aggregated to form embryoid bodies (EBs). The NTE differentiation was performed according to published protocols (Wang et al., 2011), the D2 EBs were then continuously cultured in neural differentiation medium consisting of DMEM/F12 (Invitrogen), N2 supplement (Invitrogen), B27 supplement (without vitamin A, Invitrogen), 2 mM L-glutamax, 2 mM NEAA, and chemically defined lipid concentrate (Invitrogen) for the next 4-6 days. The NCC differentiation was performed modified from published protocol (Minamino et al., 2015), the D2 EBs were cultured in neural differentiation medium supplemented with FGF2 (10 ng/ml, Sino Biological, CAT# 10014-HNAE-500) and BIO (0.6  $\mu$ M, Selleck, CAT# S7198) for the next 4-6 days. After EBs attached to Matrigel-coated culture dishes and continue cultured in neural differentiation medium, the NCC migrated out of the spheres.

### **Human ESC (hESC) culture and differentiation**

Human ESC H9 (WiCell Institute, Madison, WI, USA, passages 25-45) was cultured on irradiated mouse embryonic fibroblasts (MEFs) as described in the standard protocol (<http://www.wicell.org>). The NTE differentiation of hESCs was performed according to published protocols (Zhang et al., 2001; Zhang et al., 2010). Human ESCs were detached by incubating with Dispase and the colonies were

cultured in suspension as EBs in the hESC medium consisting of DMEM/F12 (GIBCO), 20% KOSR, 2 mM NEAA, 2 mM L-glutamax, and 0.1 mM  $\beta$ -Mercaptoethanol. On D4, the hESC medium was replaced with a neural differentiation medium consisting of DMEM/F12, N2 supplement, 2 mM NEAA and 2  $\mu$ g/ml heparin (Sigma, Saint Louis, MO). On D7, the EBs were attached to the plastic or laminin-coated substrate and cultured in the neural differentiation medium and columnar neuroepithelia organized into rosette structures in 3-5 days. The NCC differentiation of hESCs was performed modified from published protocol (Liu et al., 2012; Menendez et al., 2013), the hESC colonies were cultured in the hESC medium to form EBs, on D4 the hESC medium was replaced with a neural differentiation medium, FGF2 (10 ng/ml) and BIO (0.4  $\mu$ M) were added to the medium from D4 to D10. After the EBs were attached to the Matrigel-coated dishes on D8 and continue cultured in neural differentiation medium, the neural crest cells with a stellate morphology migrated out of the spheres in 2-3 days.

### **Gene overexpression and knockdown in ESCs**

For the constitutive overexpression of genes in mESCs, miR-29b and miR-29b sponge were driven by the CAG promoter integrated into the Rosa26 locus through electroporation with engineered zinc finger nucleases, as previously described (Perez-Pinera et al., 2012). The mESCs with a CAG-*RBGpA* in Rosa26 locus were used as control. For the constitutive overexpression of genes in hESCs, miR-29b and the miR-29b sponge were driven by the CAG promoter integrated into the AAVS1 locus through electroporation with TALEN as previously described (Hockemeyer et al., 2011). The hESCs with a CAG-*RBGpA* in AAVS1 locus were used as control.

For the inducible overexpression system, advanced *rtTA* driven by the CAG promoter was integrated into the Rosa26 locus through electroporation with engineered zinc finger nucleases as previously described. A lentiviral backbone comprising the tetracycline response element (TRE) driving *HA-Pou3f1* and *HA-Pou3f1*  $\Delta$ POU(missing amino acids 241–395) (Sock et al., 1996) were cloned and used for virus packaging. Medium containing viral particles was then added to the

*rtTA* ESC line for efficient infection. For *Dnmt3a* overexpression in miR-29b OE cells, a *Dnmt3a* CDS sequence was cloned into the pCAG-puroR lentiviral vector. For miR-29b sponge overexpression in tet on *Pou3f1* cells, miR-29b sponge sequence was cloned into the pCAG-puroR lentiviral vector. The CAG-RBGpA-puroR lentivirus was used as the control.

All primers used for gene cloning are listed in Table S1.

For *Dnmt3a* knockdown in miR-29b sponge cells, shRNA targeting *Dnmt3a* was cloned into the PLKO lentiviral vector as previously described. A shRNA targeting *Luciferase* (sh*Luc*) was also designed as a control (Yang et al., 2014). The shRNA targeting *Pou3f1* (Zhu et al., 2014) and *Sox2* were cloned into the Tet-on PLKO lentiviral vector. The shRNA target sequence is listed in Table S1. Lentivirus packaging and infection were performed as previously described (Yang et al., 2014).

### **RNA extraction, cDNA synthesis and Q-PCR analysis**

Total RNA was extracted using RNAiso Plus (TaKaRa). Reverse transcription of 500 ng RNA was performed using a PrimeScript RT reagent kit (TaKaRa). Quantitative PCR (Q-PCR) was performed using a SYBR Premix Ex Taq™ Kit (TaKaRa). Gene expression was normalized to *Gapdh*. Q-PCR primers are listed in Table S2.

For quantitative miRNA analyses, reverse transcription of 500 ng RNA was performed using a miRcute miRNA First-Strand cDNA Synthesis Kit (Tiangen). Q-PCR was performed using a miRcute miRNA qPCR Detection Kit (Tiangen). The miRNA expression was normalized to U6.

### **Immunofluorescence staining**

Immunofluorescence staining was performed as previously described (Xi et al., 2012). For mESC-derived NTE and NCC EBs staining, the cultured EBs were harvested and fixed with 4% paraformaldehyde at 4°C for 15 min and dehydrated with a sucrose gradient before frozen sectioning. For mESC-derived NCC staining, the NCC EBs on D8 were plated onto 12-mm coverslips coated with poly-ornithine and

2% (v/v) Matrigel (BD Biosciences) for 2~4 days and fixed with 4% paraformaldehyde at 4°C for 15 min. For hESC-derived NTE and NCC staining, the EBs were plated onto 12-mm coverslips coated with poly-ornithine and 2% (v/v) Matrigel for 3~5 days and fixed with 4% paraformaldehyde at 4°C for 15 min.

The fixed frozen section slides and coverslip cultures were washed three times with PBS and blocked in PBS/10% donkey serum/0.1% Triton X-100 for 1 h at room temperature. Then, the samples were stained with a primary antibody overnight at 4°C, washed three times with PBS, and incubated with a secondary antibody/HO.33342 for 1 h at room temperature. Immunofluorescence images were captured by fluorescence microscopy (Nikon ECLIPSE Ti-S). Quantitative analysis was performed using ImageJ (<https://imagej.nih.gov/ij/>) software. The antibodies are listed in Table S4.

### **Western blotting**

The cells were lysed in RIPA buffer. The protein concentration was detected by a BCA assay kit (Thermo). Equal amounts of cell lysates were loaded into a gel, blotted onto a PVDF membrane and probed with primary antibodies. GAPDH was used as a loading control. The antibodies used for western blotting are listed in Table S5. The membranes were scanned with an ImageQuant LAS 4000 System (GE Healthcare Life Sciences) and quantitatively analyzed with AlphaView (<http://www.proteinsimple.com>) software.

### **Luciferase assays**

The luciferase assay was previously described (Guo et al., 2013). For the miR-29b promoter luciferase assay, miR-29b promoter sequence was cloned into the pGL3-basic vector (Promega). The primers used for miR-29b promoter gene cloning are listed in Table S1. The deletion of a 100 bp region in fragment-B was performed by Hieff Clone™ Plus Multi One Step Cloning Kit (Yeasen, CAT# 10912ES10)

NIH 3T3 cells grown in 24-well plates were transfected with 100 ng each of pcDNA3.1, pcDNA-*Sox1*, pcDNA-*Sox2*, pcDNA-*Pax6*, pcDNA-*Zfp521*,



pcDNA-*Zic1*, pcDNA-*Pou3f1* or pcDNA-*Pou3f1*  $\Delta$ POU, 200 ng of a pGL3-basic-29b promoter vector( full length or fragment), and 10 ng of a control Renilla luciferase vector (pRL-Tk; Promega) using X-tremeGENE HP DNA Transfection Reagen (Roche). After 48 h, the cells were lysed in lysis buffer. Firefly and Renilla luciferase activities were assayed using a SpectraMax M5 plate reader (Molecular Device). The firefly luciferase signal was normalized against the Renilla signal, and pcDNA3.1 was used as a negative control.

For the TOPFlash/FOPFlash assays, the D2 EBs cultured in 6 cm Petri Dish were co-transfected with 2  $\mu$ g of TOPFlash or FOPFlash plasmid (M50 Super 8x TOPFlash and M51 Super 8x FOPFlash was a gift from Randall Moon, Addgene plasmid # 12456 and 12457) and 20 ng of a control Renilla luciferase vector using X-tremeGENE HP DNA Transfection Reagen (Roche), then continue cultured for NTE and NCC differentiation, cells were lysed in lysis buffer 48h post transfection. Firefly and Renilla luciferase activities were assayed using a SpectraMax M5 plate reader (Molecular Device). The firefly luciferase signal was normalized against the Renilla signal.

### **Chromatin immunoprecipitation (ChIP)**

The ChIP assay was previously described (Wei et al., 2015). ChIP was performed with 4  $\mu$ g antibody according to a previously described protocol. Normal rabbit IgG (Millipore) was used as a negative control. Immunoprecipitated DNA was used as a template for Q-PCR analysis with primers against miR-29b promoter regions. PCR reactions were performed using a SYBR Premix Ex Taq™ Kit (TaKaRa). The primers used for ChIP-Q-PCR are listed in Table S3. The antibodies are listed in Table S6.

### **Fluorescence-activated cell sorting analysis (FACS)**

FACS was performed as previously described (Wang et al., 2013). For endogenous GFP analysis, cultured EBs were trypsinized into single cells, washed once in PBS and strained through a fine-mesh sieve prior to sorting using a FACSCalibur (BD

Biosciences). The undifferentiated mESCs were used as the negative control.

For P75 staining, the cells were harvested using 0.05% trypsin-EDTA at 37°C for 2 min, fixed in 4% paraformaldehyde, washed twice in PBS, and incubated in 100 µL of 1% donkey serum in PBS containing a goat anti-P75 antibody (1:200 dilution; Santa Cruz Technology) for 1 h and washed three times in PBS. The cells were resuspended in 100 µL of 1% donkey serum in PBS containing an Alexa Fluor 647-labeled donkey anti-goat IgG antibody (1:1000 dilution) and incubated for 30 min at room temperature. The cells were washed three times and resuspended in 500 µL of PBS. The proportion of P75-positive cells was analyzed by a FACSCalibur (BD Biosciences). The NIH 3T3 cells were used as the negative control. The FACS data were analyzed using FlowJo (<http://www.flowjo.com>) software.

### **Statistical analyses**

All statistical data were presented as the mean±SEM of at least three independent experiments. Statistical significance was calculated according to unpaired two-tailed Student's t tests using GraphPad Prism Software.  $P < 0.05$  was considered statistically significant. \* and # indicates  $P < 0.05$ , \*\* and ## indicates  $P < 0.01$ , and \*\*\* and ### indicates  $P < 0.001$ .

### **Supplemental Reference**

Guo, X., Liu, Q., Wang, G., Zhu, S., Gao, L., Hong, W., Chen, Y., Wu, M., Liu, H., Jiang, C., et al. (2013). MicroRNA-29b is a novel mediator of Sox2 function in the regulation of somatic cell reprogramming. *Cell Res* 23, 142-156.

Hockemeyer, D., Wang, H., Kiani, S., Lai, C.S., Gao, Q., Cassady, J.P., Cost, G.J., Zhang, L., Santiago, Y., Miller, J.C., et al. (2011). Genetic engineering of human pluripotent cells using TALE nucleases. *Nat Biotechnol* 29, 731-734.

Liu, Q., Spusta, S.C., Mi, R., Lassiter, R.N., Stark, M.R., Hoke, A., Rao, M.S., and Zeng, X. (2012). Human neural crest stem cells derived from human ESCs and induced pluripotent stem cells: induction, maintenance, and differentiation into functional schwann cells. *Stem Cells Transl Med*

1, 266-278.

Menendez, L., Kulik, M.J., Page, A.T., Park, S.S., Lauderdale, J.D., Cunningham, M.L., and Dalton, S. (2013). Directed differentiation of human pluripotent cells to neural crest stem cells. *Nat Protoc* 8, 203-212.

Minamino, Y., Ohnishi, Y., Kakudo, K., and Nozaki, M. (2015). Isolation and propagation of neural crest stem cells from mouse embryonic stem cells via cranial neurospheres. *Stem cells and development* 24, 172-181.

Perez-Pinera, P., Ousterout, D.G., Brown, M.T., and Gersbach, C.A. (2012). Gene targeting to the ROSA26 locus directed by engineered zinc finger nucleases. *Nucleic acids research* 40, 3741-3752.

Sock, E., Enderich, J., Rosenfeld, M.G., and Wegner, M. (1996). Identification of the nuclear localization signal of the POU domain protein Tst-1/Oct6. *J Biol Chem* 271, 17512-17518.

Wang, G., Guo, X., Hong, W., Liu, Q., Wei, T., Lu, C., Gao, L., Ye, D., Zhou, Y., Chen, J., et al. (2013). Critical regulation of miR-200/ZEB2 pathway in Oct4/Sox2-induced mesenchymal-to-epithelial transition and induced pluripotent stem cell generation. *Proc Natl Acad Sci U S A* 110, 2858-2863.

Wang, Z.B., Boisvert, E., Zhang, X., Guo, M., Fashoyin, A., Du, Z.W., Zhang, S.C., and Li, X.J. (2011). Fezf2 regulates telencephalic precursor differentiation from mouse embryonic stem cells. *Cerebral cortex* 21, 2177-2186.

Wei, T., Chen, W., Wang, X., Zhang, M., Chen, J., Zhu, S., Chen, L., Yang, D., Wang, G., Jia, W., et al. (2015). An HDAC2-TET1 switch at distinct chromatin regions significantly promotes the maturation of pre-iPS to iPS cells. *Nucleic Acids Res* 43, 5409-5422.

Xi, J., Liu, Y., Liu, H., Chen, H., Emborg, M.E., and Zhang, S.C. (2012). Specification of midbrain dopamine neurons from primate pluripotent stem cells. *Stem Cells* 30, 1655-1663.

Yang, D., Wang, G., Zhu, S., Liu, Q., Wei, T., Leng, Y., Duan, T., and Kang, J. (2014). MiR-495 suppresses mesendoderm differentiation of mouse embryonic stem cells via the direct targeting of Dnmt3a. *Stem Cell Res* 12, 550-561.

Zhang, S.C., Wernig, M., Duncan, I.D., Brustle, O., and Thomson, J.A. (2001). In vitro differentiation of transplantable neural precursors from human embryonic stem cells. *Nat Biotechnol* 19, 1129-1133.

Zhang, X., Huang, C.T., Chen, J., Pankratz, M.T., Xi, J., Li, J., Yang, Y., Lavaute, T.M., Li, X.J., Ayala,

M., et al. (2010). Pax6 is a human neuroectoderm cell fate determinant. *Cell Stem Cell* 7, 90-100.

Zhu, Q., Song, L., Peng, G., Sun, N., Chen, J., Zhang, T., Sheng, N., Tang, W., Qian, C., Qiao, Y., et al. (2014). The transcription factor Pou3f1 promotes neural fate commitment via activation of neural lineage genes and inhibition of external signaling pathways. *eLife* 3.
